1

2 **Quantifying microbial associations of dissolved organic matter under global change**

3

4 Ang Hu<sup>1,2</sup>, Mira Choi<sup>3</sup>, Andrew J. Tanentzap<sup>4</sup>, Jinfu Liu<sup>1,5</sup>, Kyoung-Soon Jang<sup>3</sup>, Jay T.  
5 Lennon<sup>6</sup>, Yongqin Liu<sup>7,8</sup>, Janne Soininen<sup>9</sup>, Xiancai Lu<sup>10</sup>, Yunlin Zhang<sup>1</sup>, Ji Shen<sup>11</sup>,  
6 Jianjun Wang<sup>1,8,\*</sup>

7 <sup>1</sup> State Key Laboratory of Lake Science and Environment, Nanjing Institute of Geography  
8 and Limnology, Chinese Academic of Sciences, Nanjing 210008, China

9 <sup>2</sup> College of Resources and Environment, Hunan Agricultural University, Changsha  
10 410128, China

11 <sup>3</sup> Bio-Chemical Analysis Team, Korea Basic Science Institute, Cheongju 28119, South  
12 Korea

13 <sup>4</sup> Ecosystems and Global Change Group, Department of Plant Sciences, University of  
14 Cambridge, Cambridge CB2 3EA, United Kingdom

15 <sup>5</sup> Nanchang Institute of Technology, Nanchang 330099, China

16 <sup>6</sup> Department of Biology, Indiana University, Bloomington IN 47405, USA

17 <sup>7</sup> Key Laboratory of Tibetan Environment Changes and Land Surface Processes, Institute  
18 of Tibetan Plateau Research, Chinese Academy of Sciences, Beijing 100101, China.

19 <sup>8</sup> University of Chinese Academy of Sciences, Beijing 100049, China

20 <sup>9</sup> Department of Geosciences and Geography, University of Helsinki, Helsinki FIN-00014,  
21 Finland

22 <sup>10</sup> State Key Laboratory for Mineral Deposits Research, School of Earth Sciences and  
23 Engineering, Nanjing University, Nanjing 210093, China

24 <sup>11</sup> School of Geography and Ocean Science, Nanjing University, Nanjing 210023, China

25 \* Correspondence: [jjwang@niglas.ac.cn](mailto:jjwang@niglas.ac.cn)

26

27 **Running title:** DOM-microbe associations under global change

28

29 **Abstract**

30           Microbes play a critical role in regulating the size, composition, and turnover of  
31 dissolved organic matter (DOM), which is one of the largest pools of carbon in aquatic  
32 ecosystems. Global change may alter DOM-microbe associations with implications for  
33 biogeochemical cycles, although disentangling these complex interactions remains a  
34 major challenge. Here we develop a framework called Energy-Diversity-Trait integrative  
35 Analysis (EDTiA) to examine the associations between DOM and bacteria along  
36 temperature and nutrient gradients in a manipulative field experiment on mountainsides  
37 in contrasting subarctic and subtropical climates. In both study regions, the chemical  
38 composition of DOM correlated with bacterial communities, and was primarily controlled  
39 by nutrients and to a lesser degree by temperature. At a molecular-level, DOM-bacteria  
40 associations depended strongly on the molecular traits of DOM, with negative  
41 associations indicative of decomposition as molecules are more biolabile. Using bipartite  
42 networks, we further demonstrated that negative associations were more specialized than  
43 positive associations indicative of DOM production. Nutrient enrichment promoted  
44 specialization of positive associations, but decreased specialization of negative  
45 associations particularly at warmer temperatures in subtropical climate. These global  
46 change drivers influenced specialization of negative associations most strongly via  
47 molecular traits, while both molecular traits and bacterial diversity similarly affected  
48 positive associations. Together, our framework provides a quantitative approach to  
49 understand DOM-microbe associations and wider carbon cycling across scales under  
50 global change.

51

## 52 **Introduction**

53 Dissolved organic matter (DOM), one of the largest pools of carbon in aquatic  
54 ecosystems <sup>1</sup>, is intimately interlinked with the metabolic processes of complex microbial  
55 communities <sup>2</sup>. Microbial consortia generate “chemodiversity” in the DOM pool by  
56 degrading larger molecules into smaller molecules and by synthesizing more refractory  
57 compounds from labile substrates <sup>3</sup>. These basic processes together lead to the emergence  
58 of molecular traits of DOM including chemical structure, stoichiometry, oxidation state,  
59 and bioavailability <sup>4-6</sup> that directly determine its environmental persistence <sup>7, 8</sup>. DOM, as a  
60 carbon source for microbial metabolism, also influences the diversity, structure, and  
61 functioning of microbial communities via decomposition and biosynthetic processes <sup>9-13</sup>.  
62 The resulting resource-consumer relationships can now be characterised in both aquatic  
63 <sup>14-16</sup> and terrestrial <sup>17</sup> ecosystems owing to recent advances in ultrahigh-resolution mass  
64 spectrometry and high-throughput sequencing. Despite the availability of these  
65 technologies, little is known about how DOM-microbe associations can be quantified in  
66 nature, and are interactively and independently affected by global change drivers, such as  
67 elevated temperatures and eutrophication.

68 The effects of global change on DOM-microbe associations can be viewed  
69 through three proximal controls (Fig. 1). First, energy supply, such as primary  
70 productivity, represents the major source of DOM that supports microbial metabolism <sup>18-</sup>  
71 <sup>20</sup>. In particular, elevated temperature and nutrient inputs can stimulate primary  
72 productivity in ways that influences the composition and availability of organic matter <sup>21,</sup>  
73 <sup>22</sup>, but this process also indirectly influence DOM-microbe associations by controlling  
74 their diversity and traits <sup>22-25</sup>. Second, diversity can generally beget diversity. For  
75 example, an increase in the diversity of DOM promotes microbial diversity, and vice  
76 versa <sup>15</sup>, which should be reflected as signatures in resource-consumer relationships. Such  
77 patterns may arise because resource diversity promotes microbial specialization during  
78 biochemical transformations by creating more unique resource niches for consumers to  
79 partition <sup>26, 27</sup>. Likewise, higher microbial diversity provides more metabolic pathways to  
80 decompose and produce molecules, which influences the vulnerability of DOM to  
81 degradation <sup>3</sup>. Third, DOM-microbe associations depend on the molecular traits of DOM,

82 such as its bioavailability, measured with H/C ratios of individual molecules <sup>28</sup>, and  
83 microbial traits like life history (i.e., *r*- versus *K*-selection) <sup>29</sup> and resource acquisition  
84 (i.e., generalists versus specialists) <sup>27</sup>.

85 To integrate the three proximal controls to examine how DOM-microbe  
86 associations vary under global change, we developed a framework called Energy-  
87 Diversity-Trait integrative Analysis (EDTiA) (Fig. 1). EDTiA relies on the construction  
88 of bipartite networks <sup>30</sup> to quantify the specialization between organic molecules and  
89 microbial taxa. These networks are investigated using measures of entropy such as the  $H_2'$   
90 index <sup>31</sup>, which quantify resource-consumer relationships at an ecosystem-level. For  
91 example, elevated  $H_2'$  values convey that there is a high degree of specialization between  
92 DOM and microbes <sup>31</sup>, where in the extreme example, one bacterial taxon consumes or  
93 produces a single DOM molecule. By contrast, lower  $H_2'$  reflects a more generalized  
94 bipartite network where different DOM molecules can be used by a large range of  
95 bacterial taxa. Furthermore, EDTiA allows for the integration of global change drivers to  
96 explore their relative importance of proximal controls on the specialization of DOM-  
97 microbe associations (Fig. 1).

98 We therefore used the EDTiA framework to test how associations between DOM  
99 and bacteria were jointly influenced by temperature and nutrient loading in a  
100 manipulative field experiment on subtropical and subarctic mountainsides in China and  
101 Norway <sup>32</sup>. This macroecological approach involved creating microcosms with consistent  
102 initial DOM composition but different locally colonised microbial communities and  
103 newly produced endogenous DOM. Briefly, we selected five locations with different  
104 elevations on each mountainside that spanned a mean annual temperature gradient of 4.2-  
105 12.9°C in China and -2.9-0.7 °C in Norway. We established 300 sterile aquatic  
106 microcosms composed of natural lake sediments and artificial lake water, which included  
107 ten nutrient levels at each elevation. The sediments originated from Taihu Lake, a large  
108 eutrophic shallow lake in China, and were added to each microcosm after sterilisation to  
109 ensure identical initial DOM supply and composition. Microcosms were left in the field  
110 for one month allowing airborne bacteria to colonise, and sediment bacteria were  
111 examined using high-throughput sequencing of 16S rRNA genes <sup>32</sup>. Additionally, we

112 applied ultrahigh-resolution electrospray ionization Fourier transform ion cyclotron  
113 resonance mass spectrometry (FT-ICR MS) to examine sediment DOM features, such as  
114 chemodiversity and molecular traits.

115 Our study addresses three questions: (1) How do associations between  
116 chemodiversity and microbial biodiversity respond to temperature and nutrient  
117 enrichment? (2) How does the specialization of molecular-level associations between  
118 DOM and microbes vary along temperature and nutrient gradients? (3) How is the  
119 specialization interactively and independently influenced by temperature and nutrient  
120 enrichment via the three proximal controls? Results from our study will help advance  
121 biogeochemical modeling and improve predictions about carbon turnover along with  
122 feedbacks based on resource-based constraints on microbial diversity.

123

## 124 **Results and Discussion**

### 125 **(1) DOM features and their microbial associations at a compositional-level**

126 The diversity and molecular traits of DOM were strongly controlled by nutrient  
127 enrichment but less by temperature in both mountainsides (Figs. S2-4). Nutrient  
128 enrichment generally promoted molecular richness in both regions when all molecular  
129 components were considered (Figs. 2a, S5). Using piecewise regression<sup>33</sup> and gradient  
130 forest analysis<sup>34</sup>, we identified breakpoints in molecular composition that mostly  
131 occurred between 1.80 and 4.05 mg N L<sup>-1</sup> along the nutrient gradient for all molecules at  
132 each elevation (Figs. 2a, S6). The effects of nutrient enrichment on molecular traits,  
133 however, varied between the two ecoregions (Figs. 2a, S5, S7). For instance, the  
134 weighted mean of the H/C ratio in each microcosm decreased with nutrient addition to <  
135 1.5, especially at high elevations in China, indicating less bioavailable DOM (Figs. 2a,  
136 S5c). The ratio remained consistently higher ( $\geq 1.5$ ) across all nutrient levels in Norway  
137 (Figs. 2a, S5c). Given the identical DOM composition in our study initially, this finding  
138 suggests that the contrasting responses reflect differences in the temperature-sensitivity of  
139 decomposition and/or nutrient-limited production of DOM by colonising microbes. This

140 inability to resolve the mechanisms underlying these patterns highlights the need for a  
141 more mechanistic approach offered by the EDTiA framework.

142 DOM composition was strongly associated with bacteria in both regions, and was  
143 mediated by temperature and nutrient enrichment. For instance, although environment  
144 (temperature and nutrients) and energy supply had dominant effects on DOM  
145 composition, their shared effects with biodiversity (1.0 to 26.7% of explained variation)  
146 indicated that these variables also indirectly influenced the associations between DOM  
147 and bacteria (Figs. S8-10). These DOM-microbe associations were also supported by a  
148 Procrustes analysis<sup>35,36</sup>, which revealed that more similar mixtures of molecules were  
149 related to more similar bacterial communities ( $M^2 = 0.701$ ,  $P \leq 0.001$ ; Fig. 2b), and their  
150 associations varied with temperature (that is, elevation) and nutrient enrichment. For  
151 example, compositional differences, indicated by the residuals of Procrustes analysis,  
152 significantly ( $P \leq 0.05$ ) decreased for all compound classes or elemental combinations at  
153 colder temperatures in China (Fig. S11). In Norway, the differences were always lower,  
154 on average, and did not vary with temperature (Fig. S11). Nutrient enrichment similarly  
155 influenced the correlations between DOM molecular and bacterial compositions  
156 estimated from both alpha and beta diversity (Fig. 2c), and these correlations also varied  
157 with nutrients for individual compound classes or elemental combinations (Figs. S12,  
158 S13). Interestingly, the coordinated compositional changes in DOM and bacteria,  
159 measured by the correlation between beta diversities, increased more strongly with  
160 nutrient enrichment in Norway than in China, especially at low nutrient levels beneath  
161  $1.80 \text{ mg N L}^{-1}$  (Figs. 2c, S13).

162

## 163 **(2) Networks between DOM and bacteria at a molecular-level**

164 To quantify the associations between DOM and bacteria further at a molecular-  
165 level, we first correlated the relative abundance of DOM molecules and bacterial taxa.  
166 According to resource-consumer relationships, negative associations likely indicate the  
167 degradation of larger molecules into smaller structures, while positive associations may  
168 relate to the production of new molecules via degradation or biosynthetic processes. We  
169 found that the distribution of negative and positive correlations between DOM molecules

170 and bacterial operational taxonomic units (OTUs) depended strongly on molecular traits.  
171 For example, more labile molecules, such as those with  $H/C \geq 1.5$ , were more likely to  
172 show negative Spearman's correlation coefficients  $\rho$  with individual OTUs ( $P \leq 0.05$ ),  
173 whereas more recalcitrant molecules ( $H/C < 1.5$ ) generally showed more positive  
174 correlations ( $P \leq 0.05$ ), especially in Norway (Fig. S14). These findings were even more  
175 clearly supported by the differences between the mean of the positive and negative  $\rho$   
176 values for each molecule (Figs. 3a, S15). Correlations with individual OTUs were  
177 predominantly negative for molecules within a H/C of 1.5-2.0 and O/C of 0.4-1.0,  
178 suggesting they were the outcome of degradation processes, while  $\rho$  differences peaked  
179 with mainly positive values at a H/C of 1.0-1.5 and O/C of 0-0.5 indicative of *in situ*  
180 production (Fig. 3a).

181 Subsequently, we quantified DOM-microbe associations along temperature and  
182 nutrient gradients using the EDTiA framework. We built bipartite networks of negative  
183 and positive interactions between DOM and bacteria at the genus level using Sparse  
184 Correlations for Compositional data (SparCC)<sup>37</sup>. SparCC relies on algorithms for sparse  
185 neighborhood and inverse covariance selection, and can infer correlations with a high  
186 degree of accuracy under these conditions<sup>37</sup>. In total, there were 6,916 and 8,409  
187 interactions for negative and positive networks ( $|\text{SparCC } \rho| \geq 0.3$ ), respectively, in China,  
188 and 1,313 and 2,888 negative and positive interactions, respectively, in Norway (Fig. 3b).  
189 The weighted mean of the percentage of SparCC  $\rho$  values that were strongly negative ( $P$   
190  $\leq 0.05$ ) increased towards high nutrient levels, with the reverse pattern for positive  
191 networks, almost exclusively in China (Fig. S16). Such patterns were consistent with the  
192 weighted mean SparCC  $\rho$  in China (Fig. S16).

193 The negative and positive interaction networks strongly depended on molecular  
194 traits, which was further supported by three observations. First, negative and positive  
195 networks were associated with different molecule groups categorised by hierarchical  
196 cluster analysis based on the 16 molecular traits (Figs. 3b, S17). In China, negative  
197 interactions were dominant between molecule clusters 4 and 5, which were largely  
198 comprised of recalcitrant molecules with a H/C of  $< 1.5$  (Fig. S17), and bacteria in the  
199 phyla Proteobacteria, Bacteroidetes, or Firmicutes (Fig. 3b). The positive interactions



200 were mostly linked to clusters 1 and 3 (Fig. 3b), which mostly represented labile  
201 molecules with a H/C of  $\geq 1.5$  (Fig. S17). In Norway, molecule cluster 4 was mainly  
202 negatively linked to Firmicutes and positively linked to  $\alpha$ - and  $\beta$ -Proteobacteria (Fig. 3b).  
203 Second, molecules generally covaried more similarly with microbes as they shared more  
204 similar traits. For example, we detected statistically significant correlations between the  
205 pairwise Gower distances<sup>38</sup> of the traits and SparCC  $\rho$  values of DOM molecules in each  
206 region (Mantel test,  $P \leq 0.001$ ; Fig. 3c). Third, molecular traits were more strongly  
207 correlated with SparCC  $\rho$  in the negative than positive interaction networks for all  
208 molecules (Fig. 3c), which was also true for most of the networks when considering  
209 compound classes or elemental combinations (Fig. 3d). These correlations, consistent at  
210 the OTU level (Fig. 3c), indicate that molecular traits may be better at predicting the  
211 decomposition than production of DOM.

212 Finally, we calculated the degree of specialization between DOM and bacteria in  
213 the entire negative and positive interaction networks using the  $H_2'$  index<sup>31</sup>. We also  
214 calculated specialization  $d'$  indices for individual DOM molecules and bacterial genera<sup>31</sup>.  
215 Elevated  $H_2'$  or  $d'$  values indicate a high degree of specialization, while lower values  
216 suggest increased generalization. We found that networks that were more specialized in  
217 the negative associations between DOM and bacteria (i.e., higher  $H_2'$  values)  
218 corresponded with more specialized communities of DOM molecules (i.e., higher  
219 weighted mean  $d'$ ; Figs. S18, S19)<sup>31</sup>. For positive networks,  $H_2'$  values mirrored those of  
220  $d'$  for both DOM and bacteria (Figs. S18, S19). These results suggest that in addition to  
221 the specialization perspective of bacteria or DOM,  $H_2'$  can summarise resource-consumer  
222 relationships at an ecosystem-level. In both regions,  $H_2'$  was higher, on average, in  
223 negative than positive interaction networks ( $t$ -test,  $t = 2.11$ ,  $P = 0.04$  in China and  $t =$   
224  $23.57$ ,  $P \leq 0.001$  in Norway; Figs. 4a, S20), indicating a higher degree of specialization in  
225 the decomposition than production processes of microbes. Copiotrophs may have a high  
226 substrate specificity for labile resources as compared with oligotrophs<sup>39</sup>, which have  
227 multiple metabolic pathways for resource acquisition of complex organic matter and  
228 hence lower specialization<sup>40</sup>. The mean specialization  $H_2'$  of negative ( $t$ -test,  $t = -10.19$ ,  
229  $P \leq 0.001$ ) and positive ( $t$ -test,  $t = -6.56$ ,  $P \leq 0.001$ ) networks were also significantly



230 higher in Norway than in China (Fig. 4a), suggesting more specialized decomposition  
231 (i.e., negative networks) and thus potentially more degradable DOM in subarctic regions.

232 Nutrient enrichment showed divergent effects on the  $H_2'$  of negative or positive  
233 interaction networks between the two study regions. Specifically, nutrient enrichment  
234 substantially decreased the  $H_2'$  of negative networks for all molecules in China (Fig. 4a),  
235 which was particularly true when considering only recalcitrant components, such as  
236 lignin and CHNO (Fig. S21). Compared to Norway, nutrient enrichment increased the  $H_2'$   
237 of positive interactions relatively more at lower elevations in China (Fig. 4a). Nutrient  
238 enrichment at the warmer temperatures in the subtropical region could thus contribute to  
239 the greater recalcitrance of DOM by reducing the specialization of decomposition (i.e.,  
240 negative networks) and resulting in more specialized production of molecules (i.e.,  
241 positive networks).

242

### 243 **(3) Drivers of DOM-microbe associations**

244 We explored the following distal and proximal controls on negative and positive  
245 DOM-microbe networks under the EDTiA framework (Fig. 1). The distal drivers were  
246 temperature and nutrient enrichment as proxies of climate change and human impacts,  
247 respectively. The three proximal drivers were energy supply, such as primary  
248 productivity and sediment total organic carbon, the diversity of bacteria and DOM, that is  
249 the richness and composition of bacteria and DOM, and the DOM molecular traits (Table  
250 S1). In addition to bacterial diversity and chemodiversity, molecular traits strongly  
251 correlated with  $H_2'$  and influenced it through hypothesised casual relationships in  
252 structural equation models (SEM) <sup>41</sup> (Fig. S1).

253 The importance of molecular traits was supported by Pearson correlations (Fig.  
254 S22), multiple regression models (Fig. S23) and random forest analyses <sup>42</sup> (Fig. 4b). For  
255 the negative networks,  $H_2'$  showed the highest Pearson correlation coefficient of  $r = 0.77$   
256 with molecular composition ( $P \leq 0.001$ ), followed by molecular richness ( $r = -0.76$ ,  $P \leq$   
257  $0.001$ ) and N/P ratio ( $r = 0.76$ ,  $P \leq 0.001$ , Fig. S22). In contrast,  $H_2'$  was less correlated  
258 with molecular traits for the positive networks (Fig. S22). Multiple regression models

259 revealed that, for negative and positive networks in China, there were statistically  
260 significant ( $P \leq 0.01$ ) improvements in the explained variances of models by between 6.2%  
261 and 9.1% from including either diversity or molecular traits (Fig. S23). These  
262 improvements were larger for the negative interaction networks in Norway (Fig. S23).  
263 These effects of diversity and molecular traits were further supported by random forest  
264 analyses. Diversity and molecular traits improved the predictive power of models of  $H_2'$   
265 by 7.9-26.1% and 2.1-14.8%, respectively, and again, most strongly for the negative  
266 interactions in both regions (Fig. S23). Furthermore,  $H_2'$  was mainly affected by  
267 chemodiversity, such as molecular richness or DOM composition, followed by molecular  
268 traits, such as N/P or N/C ratios, in the negative networks, whereas chemodiversity,  
269 biodiversity, environmental variables and energy supply were all similarly important in  
270 the positive networks (Fig. 4b).

271 We also used SEM to test the hypothesised effects of two global change drivers,  
272 climate change and human impacts, on the specialization of DOM-bacteria networks. We  
273 compared these effects to other drivers like contemporary nutrients, energy supply,  
274 biodiversity, chemodiversity and molecular traits (Fig. S1). The SEM results strongly  
275 indicated that there were different constraints on DOM-microbe specialization between  
276 negative and positive interaction networks. For the negative networks, both global change  
277 drivers strongly influenced  $H_2'$  through indirect effects on energy supply and molecular  
278 traits, especially in China (Figs. 5, S24). In contrast to Norway, both climate change and  
279 human impacts had larger total mean effects of -0.23 and -0.49, respectively, on the  $H_2'$   
280 of negative networks in China (Fig. 5a). However, molecular traits had the dominant  
281 direct effects on  $H_2'$  in both China and Norway, with similar mean standardised effect  
282 size of 0.57 ( $P \leq 0.001$ ; Figs. 5b, S24). For the positive networks, there were large total  
283 mean effects of climate change (0.51 and -0.40 for China and Norway, respectively) and  
284 human impacts (0.44 and 0.62, respectively), both of which indirectly influenced  $H_2'$   
285 similarly through biodiversity, chemodiversity and molecular traits (Figs. 5, S24).

286

#### 287 **(4) Implications**

288           The factors that control microbial processing of DOM composition, and  
289 consequently its degradation, remain challenging to discern <sup>43</sup>, yet are critical for  
290 predicting carbon cycling under global change scenarios. We found that associations  
291 between DOM and microbial decomposers depended on universal drivers of ecosystem  
292 functioning, such as energy supply <sup>21,22</sup>, both DOM and microbial compositions <sup>8,15</sup>, and  
293 molecular traits <sup>7,28</sup>. The EDTiA framework we developed provides a unified approach to  
294 identify when each of these different proximal drivers is more important, and to separate  
295 contrasting biological processes associated with DOM degradation and production that  
296 may have obscured previous analyses of bulk DOM pools. In addition to energy supply  
297 and the diversity of DOM and bacteria, we found that molecular traits generally helped  
298 shape DOM-microbe networks across contrasting climatic zones, especially the negative  
299 networks indicative of degradation processes. Although molecular traits are well known  
300 to be associated with DOM persistence or vulnerability to degradation <sup>7,44</sup>, their influence  
301 on the underlying biological mechanisms has remained poorly understood. Our results  
302 advance this work by demonstrating when the specialization of DOM-microbe  
303 associations changes with molecular traits, and by providing predictions of how  
304 specialization might vary under global change.

305           We found that temperature and eutrophication can change DOM-microbe  
306 associations by shifting the three proximal drivers, namely energy, diversity, and traits.  
307 For positive bipartite networks, nutrient enrichment generally increased the specialization  
308 of DOM-microbe associations, and more so than temperature, by changing biodiversity,  
309 chemodiversity, and molecular traits. Positive interactions related to the production of  
310 new molecules depend on the specific interacting partners, which is partly supported by  
311 the positive relationships between  $H_2'$  and  $d'$  (Fig. S19). By contrast, both temperature  
312 and nutrient enrichment reduced specialization in the negative networks, primarily via  
313 changing molecular traits and energy supply. Decomposition processes associated with  
314 negative networks may depend more on whether molecules contain structures that resist  
315 degradation <sup>7</sup>, especially in the absence of temperature limitation <sup>45</sup>. At higher  
316 temperatures, such as in subtropical China, energy to degrade these molecules may  
317 become more limiting <sup>45</sup>. We also found that the importance of these distal drivers of  
318 climate change and human impacts varied between biomes. For instance, both elevated

319 temperature and eutrophication reduced the specialization of negative DOM-microbe  
320 networks indicative of decomposition processes in subtropical China, but these two  
321 drivers were less important in subarctic Norway. As their indirect effects via microbial  
322 composition varied between biomes, these responses may reflect differences in the  
323 biological traits of communities. Future studies with metagenomics could offer a  
324 powerful complement to test how microbial traits vary with DOM traits.

325         As inland water worldwide continues to undergo changes in climate <sup>46</sup> and trophic  
326 state <sup>47</sup>, our approaches could be applied to predict changes in how microbes degrade and  
327 produce DOM. For instance, since hyper-eutrophication occurred in Taihu Lake in May  
328 2007, total nitrogen has been reduced by a mean ( $\pm$  SD) of 1.24 ( $\pm$  1.41) mg L<sup>-1</sup> with  
329 strong lake management (Figs. S25, S26). Based on the estimated direct and indirect  
330 effects of distal controls in the SEM fitted to the Chinese data (Fig. S1), this  
331 oligotrophication, combined with a mean decrease in water temperature of 0.20 ( $\pm$   
332 0.87) °C between 2007 and 2018, was predicted to change the specialization of DOM-  
333 microbe associations. Specifically,  $H_2'$  changed by +0.65 ( $\pm$  0.58) and -0.65 ( $\pm$  0.46) for  
334 negative and positive networks, respectively, over this period (Fig. 6a). The greatest  
335 changes happened in the most eutrophic part of the lake, including the northwestern  
336 lakeshore and the northern Zhushan and Meiliang Bays (Figs. 6b, S27). Although our  
337 predictions ignored detailed spatiotemporal environmental variations as used to  
338 parameterize the SEM models, they do illustrate the potential to upscale our predictions  
339 in real-world settings. This understanding, facilitated through our EDTiA framework,  
340 could provide the first steps for improving Earth system models of global biogeochemical  
341 cycles <sup>48</sup>. More generally, our work shows how the molecular traits of DOM will control  
342 the responses of DOM-microbe networks and their associated biogeochemical cycles in a  
343 changing world.

## 344 **Acknowledgements**

345 We appreciate C.Y. Zhang, L.Z. Dai and F.Y. Pan for field sampling and lab  
346 analyses, and T. Dittmar and C.L. Zhang for valuable suggestions. We thank Taihu  
347 Laboratory for Lake Ecosystem Research for providing long-term data of Taihu Lake.  
348 This study was supported by National Natural Science Foundation of China (91851117),  
349 CAS Key Research Program of Frontier Sciences (QYZDB-SSW-DQC043), and  
350 National Natural Science Foundation of China (42077052, 41871048). KJ was supported  
351 by Korea Basic Science Institute grants (C140222, C140444). AJT was supported by  
352 H2020 ERC Grant (sEEInGDOM 804673). JTL was supported by National Science  
353 Foundation (DEB-1442246, 1934554), US Army Research Office Grant (W911NF-14-1-  
354 0411), and the National Aeronautics and Space Administration (80NSSC20K0618).

355

## 356 **Conflict of Interest**

357 The authors declare no conflict of interest.

358

## 359 **Author contributions**

360 JW conceived the idea. JW carried out the field trips and provided the  
361 physiochemical and biological data. JL, MC and KJ analysed the DOM. AH and JW  
362 performed the statistical analyses. AH wrote the first draft of the manuscript. AH and JW  
363 finished the manuscript with the comments from AJT, JTL, JS, KJ, YL and XL. All  
364 authors contributed to the intellectual development of this study.

365

## 366 **Data availability**

367 Bacterial sequences and environmental data are available in Wang *et al* (2016)<sup>32</sup>.  
368 Other data are available from the corresponding author upon reasonable request.

369

370

371 **References**

- 372 1. Dittmar T, Stubbins A. Dissolved Organic Matter in Aquatic Systems. *Treatise on*  
373 *Geochemistry, 2nd edn Elsevier: Oxford* 2014: 125-156.
- 374  
375 2. Zhang C, Dang H, Azam F, Benner R, Legendre L, Passow U, *et al.* Evolving paradigms  
376 in biological carbon cycling in the ocean. *Natl Sci Rev* 2018, **5**(4): 481-499.
- 377  
378 3. Kujawinski EB. The Impact of Microbial Metabolism on Marine Dissolved Organic  
379 Matter. *Annu Rev Mar Sci* 2011, **3**(1): 567-599.
- 380  
381 4. Lennon J, Pfaff L. Source and supply of terrestrial organic matter affects aquatic  
382 microbial metabolism. *Aquat Microb Ecol* 2005, **39**: 107-119.
- 383  
384 5. Berggren M, Ström L, Laudon H, Karlsson J, Jonsson A, Giesler R, *et al.* Lake secondary  
385 production fueled by rapid transfer of low molecular weight organic carbon from  
386 terrestrial sources to aquatic consumers. *Ecol Lett* 2010, **13**(7): 870-880.
- 387  
388 6. Cherif M, Loreau M. Stoichiometric Constraints on Resource Use, Competitive  
389 Interactions, and Elemental Cycling in Microbial Decomposers. *Am Nat* 2007, **169**(6):  
390 709-724.
- 391  
392 7. Kellerman AM, Kothawala DN, Dittmar T, Tranvik LJ. Persistence of dissolved organic  
393 matter in lakes related to its molecular characteristics. *Nat Geosci* 2015, **8**(6): 454-457.
- 394  
395 8. Roth V-N, Lange M, Simon C, Hertkorn N, Bucher S, Goodall T, *et al.* Persistence of  
396 dissolved organic matter explained by molecular changes during its passage through soil.  
397 *Nat Geosci* 2019, **12**(9): 755-761.
- 398  
399 9. Judd KE, Crump BC, Kling GW. Variation in Dissolved Organic Matter Controls  
400 Bacterial Production and Community Composition. *Ecology* 2006, **87**(8): 2068-2079.
- 401  
402 10. Amaral V, Graeber D, Calliari D, Alonso C. Strong linkages between DOM optical  
403 properties and main clades of aquatic bacteria. *Limnol Oceanogr* 2016, **61**(3): 906-918.
- 404  
405 11. Logue JB, Stedmon CA, Kellerman AM, Nielsen NJ, Andersson AF, Laudon H, *et al.*  
406 Experimental insights into the importance of aquatic bacterial community composition to  
407 the degradation of dissolved organic matter. *ISME J* 2015, **10**(3): 533-545.
- 408  
409 12. Li X-M, Chen Q-L, He C, Shi Q, Chen S-C, Reid BJ, *et al.* Organic Carbon Amendments  
410 Affect the Chemodiversity of Soil Dissolved Organic Matter and Its Associations with  
411 Soil Microbial Communities. *Environ Sci Technol* 2018, **53**(1): 50-59.

412

- 413 13. Orland C, Yakimovich KM, Mykytczuk NCS, Basiliko N, Tanentzap AJ. Think global,  
414 act local: The small - scale environment mainly influences microbial community  
415 development and function in lake sediment. *Limnol Oceanogr* 2020, **65**(S1).
- 416  
417 14. Osterholz H, Singer G, Wemheuer B, Daniel R, Simon M, Niggemann J, *et al.*  
418 Deciphering associations between dissolved organic molecules and bacterial communities  
419 in a pelagic marine system. *ISME J* 2016, **10**(7): 1717-1730.
- 420  
421 15. Tanentzap AJ, Fitch A, Orland C, Emilson EJS, Yakimovich KM, Osterholz H, *et al.*  
422 Chemical and microbial diversity covary in fresh water to influence ecosystem  
423 functioning. *Proc Natl Acad Sci U S A* 2019, **116**(49): 24689.
- 424  
425 16. Danczak RE, Chu RK, Fansler SJ, Goldman AE, Graham EB, Tfaily MM, *et al.* Using  
426 metacommunity ecology to understand environmental metabolomes. *Nat Commun* 2020,  
427 **11**(1): 6369.
- 428  
429 17. Li H-Y, Wang H, Wang H-T, Xin P-Y, Xu X-H, Ma Y, *et al.* The chemodiversity of  
430 paddy soil dissolved organic matter correlates with microbial community at continental  
431 scales. *Microbiome* 2018, **6**(1).
- 432  
433 18. Sarmiento H, Gasol JM. Use of phytoplankton-derived dissolved organic carbon by  
434 different types of bacterioplankton. *Environ Microbiol* 2012, **14**(9): 2348-2360.
- 435  
436 19. Baines SB, Pace ML. The production of dissolved organic matter by phytoplankton and  
437 its importance to bacteria: Patterns across marine and freshwater systems. *Limnol*  
438 *Oceanogr* 1991, **36**(6): 1078-1090.
- 439  
440 20. Zhang Y, van Dijk MA, Liu M, Zhu G, Qin B. The contribution of phytoplankton  
441 degradation to chromophoric dissolved organic matter (CDOM) in eutrophic shallow  
442 lakes: field and experimental evidence. *Water Res* 2009, **43**(18): 4685-4697.
- 443  
444 21. Herzsprung P, Wentzky V, Kamjunke N, von Tümpling W, Wilske C, Friese K, *et al.*  
445 Improved Understanding of Dissolved Organic Matter Processing in Freshwater Using  
446 Complementary Experimental and Machine Learning Approaches. *Environ Sci Technol*  
447 2020, **54**(21): 13556-13565.
- 448  
449 22. Sarmiento H, Morana C, Gasol JM. Bacterioplankton niche partitioning in the use of  
450 phytoplankton-derived dissolved organic carbon: quantity is more important than quality.  
451 *ISME J* 2016, **10**(11): 2582-2592.
- 452  
453 23. Worm B, Lotze HK, Hillebrand H, Sommer U. Consumer versus resource control of  
454 species diversity and ecosystem functioning. *Nature* 2002, **417**(6891): 848-851.
- 455



- 456 24. Chase JM. Stochastic Community Assembly Causes Higher Biodiversity in More  
457 Productive Environments. *Science* 2010, **328**(5984): 1388.
- 458  
459 25. Kassen R, Buckling A, Bell G, Rainey P. Diversity peaks at intermediate productivity in  
460 a laboratory microcosm. *Nature* 2000, **406**: 508-512.
- 461  
462 26. Finke DL, Snyder WE. Niche Partitioning Increases Resource Exploitation by Diverse  
463 Communities. *Science* 2008, **321**(5895): 1488.
- 464  
465 27. Muscarella ME, Boot CM, Broeckling CD, Lennon JT. Resource heterogeneity structures  
466 aquatic bacterial communities. *ISME J* 2019, **13**(9): 2183-2195.
- 467  
468 28. Danczak RE, Goldman AE, Chu RK, Toyoda JG, Garayburu-Caruso VA, Tolić N, *et al.*  
469 Ecological theory applied to environmental metabolomes reveals compositional  
470 divergence despite conserved molecular properties. *bioRxiv* 2020:  
471 2020.2002.2012.946459.
- 472  
473 29. Fierer N, Bradford MA, Jackson RB. Toward an ecological classification of soil bacteria.  
474 *Ecology* 2007, **88**(6): 1354-1364.
- 475  
476 30. Dormann CF, Frund J, Bluthgen N, Gruber B. Indices, Graphs and Null Models:  
477 Analyzing Bipartite Ecological Networks. *The Open Ecology Journal* 2009, **2**: 7-24.
- 478  
479 31. Bluthgen N, Menzel F, Bluthgen N. Measuring specialization in species interaction  
480 networks. *BMC Ecol* 2006, **6**: 9.
- 481  
482 32. Wang J, Pan F, Soininen J, Heino J, Shen J. Nutrient enrichment modifies temperature-  
483 biodiversity relationships in large-scale field experiments. *Nat Commun* 2016, **7**: 13960.
- 484  
485 33. Muggeo V. Segmented: An R Package to Fit Regression Models With Broken-Line  
486 Relationships. *R News* 2008, **8**: 20-25.
- 487  
488 34. Ellis N, Smith SJ, Pitcher CR. Gradient forests: calculating importance gradients on  
489 physical predictors. *Ecology* 2012, **93**(1): 156-168.
- 490  
491 35. Gower JC. Generalized procrustes analysis. *Psychometrika* 1975, **40**(1): 33-51.
- 492  
493 36. Hurley J, Cattell R. The PROCUSTES program: producing direct rotation to test a  
494 hypothesized factor structure. *Behav Sci* 2007, **7**: 258-262.
- 495  
496 37. Friedman J, Alm EJ. Inferring Correlation Networks from Genomic Survey Data. *PLoS*  
497 *Comput Biol* 2012, **8**(9): e1002687.

- 498  
499 38. Gower JC. A general coefficient of similarity and some of its properties. *Biometrics* 1971,  
500 **27**: 857-871.
- 501  
502 39. Malik AA, Martiny JBH, Brodie EL, Martiny AC, Treseder KK, Allison SD. Defining  
503 trait-based microbial strategies with consequences for soil carbon cycling under climate  
504 change. *ISME J* 2020, **14**(1): 1-9.
- 505  
506 40. Lauro FM, McDougald D, Thomas T, Williams TJ, Egan S, Rice S, *et al.* The genomic  
507 basis of trophic strategy in marine bacteria. *Proc Natl Acad Sci U S A* 2009, **106**(37):  
508 15527-15533.
- 509  
510 41. Grace JB, Schoolmaster Jr. DR, Guntenspergen GR, Little AM, Mitchell BR, Miller KM,  
511 *et al.* Guidelines for a graph-theoretic implementation of structural equation modeling.  
512 *Ecosphere* 2012, **3**(8): art73.
- 513  
514 42. Breiman L. Random Forests. *Mach Learn* 2001, **45**(1): 5-32.
- 515  
516 43. Kothawala DN, Kellerman AM, Catalan N, Tranvik LJ. Organic Matter Degradation  
517 across Ecosystem Boundaries: The Need for a Unified Conceptualization. *Trends Ecol*  
518 *Evol* 2021, **36**(2): 113-122.
- 519  
520 44. Kellerman AM, Guillemette F, Podgorski DC, Aiken GR, Butler KD, Spencer RGM.  
521 Unifying Concepts Linking Dissolved Organic Matter Composition to Persistence in  
522 Aquatic Ecosystems. *Environ Sci Technol* 2018, **52**(5): 2538-2548.
- 523  
524 45. Davidson EA, Janssens IA. Temperature sensitivity of soil carbon decomposition and  
525 feedbacks to climate change. *Nature* 2006, **440**(7081): 165-173.
- 526  
527 46. Sinha E, Michalak AM, Balaji V. Eutrophication will increase during the 21st century as  
528 a result of precipitation changes. *Science* 2017, **357**(6349): 405.
- 529  
530 47. Anderson NJ, Bennion H, Lotter AF. Lake eutrophication and its implications for organic  
531 carbon sequestration in Europe. *Global Change Biol* 2014, **20**(9): 2741-2751.
- 532  
533 48. Wieder WR, Allison SD, Davidson EA, Georgiou K, Hararuk O, He Y, *et al.* Explicitly  
534 representing soil microbial processes in Earth system models. *Global Biogeochem Cy*  
535 2015, **29**(10): 1782-1800.
- 536  
537 49. Caporaso JG, Kuczynski J, Stombaugh J, Bittinger K, Bushman FD, Costello EK, *et al.*  
538 QIIME allows analysis of high-throughput community sequencing data. *Nat Methods*  
539 2010, **7**(5): 335-336.
- 540

- 541 50. Choi JH, Jang E, Yoon YJ, Park JY, Kim T-W, Becagli S, *et al.* Influence of Biogenic  
542 Organics on the Chemical Composition of Arctic Aerosols. *Global Biogeochem Cy* 2019,  
543 **33**(10): 1238-1250.
- 544  
545 51. Dittmar T, Koch B, Hertkorn N, Kattner G. A simple and efficient method for the solid-  
546 phase extraction of dissolved organic matter (SPE-DOM) from seawater. *Limnol*  
547 *Oceanogr Meth* 2008, **6**(6): 230-235.
- 548  
549 52. Tolić N, Liu Y, Liyu A, Shen Y, Tfaily MM, Kujawinski EB, *et al.* Formularity:  
550 Software for Automated Formula Assignment of Natural and Other Organic Matter from  
551 Ultrahigh-Resolution Mass Spectra. *Anal Chem* 2017, **89**(23): 12659-12665.
- 552  
553 53. Kujawinski EB, Behn MD. Automated Analysis of Electrospray Ionization Fourier  
554 Transform Ion Cyclotron Resonance Mass Spectra of Natural Organic Matter. *Anal Chem*  
555 2006, **78**(13): 4363-4373.
- 556  
557 54. Koch BP, Dittmar T, Witt M, Kattner G. Fundamentals of Molecular Formula  
558 Assignment to Ultrahigh Resolution Mass Data of Natural Organic Matter. *Anal Chem*  
559 2007, **79**(4): 1758-1763.
- 560  
561 55. Kim S, Kramer RW, Hatcher PG. Graphical Method for Analysis of Ultrahigh-Resolution  
562 Broadband Mass Spectra of Natural Organic Matter, the Van Krevelen Diagram. *Anal*  
563 *Chem* 2003, **75**(20): 5336-5344.
- 564  
565 56. Legendre P, Legendre L. *Numerical Ecology*. Elsevier Scientific: Oxford, U.K., 1998.
- 566  
567 57. Dixon P. VEGAN, a package of R functions for community ecology. *J Veg Sci* 2003, **14**:  
568 927-930.
- 569  
570 58. Koch BP, Dittmar T. From mass to structure: an aromaticity index for high-resolution  
571 mass data of natural organic matter. *Rapid Commun Mass Spectrom* 2016, **30**(1): 250-  
572 250.
- 573  
574 59. LaRowe DE, Van Cappellen P. Degradation of natural organic matter: A thermodynamic  
575 analysis. *Geochim Cosmochim Acta* 2011, **75**(8): 2030-2042.
- 576  
577 60. Hughey CA, Hendrickson CL, Rodgers RP, Marshall AG, Qian K. Kendrick Mass Defect  
578 Spectrum: A Compact Visual Analysis for Ultrahigh-Resolution Broadband Mass  
579 Spectra. *Anal Chem* 2001, **73**(19): 4676-4681.
- 580  
581 61. Song H-S, Stegen JC, Graham EB, Lee J-Y, Garayburu-Caruso VA, Nelson WC, *et al.*  
582 Representing Organic Matter Thermodynamics in Biogeochemical Reactions via  
583 Substrate-Explicit Modeling. *Frontiers in Microbiology* 2020, **11**(2625).

- 584  
585 62. Schneidman-Duhovny D, Bramer LM, White AM, Stratton KG, Thompson AM,  
586 Claborne D, *et al.* ftmsRanalysis: An R package for exploratory data analysis and  
587 interactive visualization of FT-MS data. *PLoS Comput Biol* 2020, **16**(3): e1007654.
- 588  
589 63. Lavorel S, Grigulis K, McIntyre S, Williams NSG, Garden D, Dorrough J, *et al.*  
590 Assessing functional diversity in the field – methodology matters! *Funct Ecol* 2007, **22**:  
591 134-147.
- 592  
593 64. Peres-Neto PR, Jackson DA. How well do multivariate data sets match? The advantages  
594 of a Procrustean superimposition approach over the Mantel test. *Oecologia* 2001, **129**(2):  
595 169-178.
- 596  
597 65. Hiemstra PH, Pebesma EJ, Twenhöfel CJW, Heuvelink GBM. Real-time automatic  
598 interpolation of ambient gamma dose rates from the Dutch radioactivity monitoring  
599 network. *Comput Geosci* 2009, **35**(8): 1711-1721.
- 600  
601 66. Dormann CF, Strauss R, Peres-Neto P. A method for detecting modules in quantitative  
602 bipartite networks. *Methods Ecol Evol* 2014, **5**(1): 90-98.
- 603  
604 67. Gu Z, Gu L, Eils R, Schlesner M, Brors B. circize Implements and enhances circular  
605 visualization in R. *Bioinformatics* 2014, **30**(19): 2811-2812.
- 606  
607 68. Liaw A, Wiener M. Classification and Regression by randomForest. *R News* 2002, **2**: 18-  
608 22.
- 609  
610 69. Borcard D, Legendre P, Drapeau P. Partialling out the spatial component of ecological  
611 variation. *Ecology* 1992, **73**: 1045–1055.
- 612  
613 70. Miller JK, Farr SD. Bimultivariate redundancy: a comprehensive measure of interbattery  
614 relationship. *Multivar Behav Res* 1971, **6**: 313–324.
- 615  
616 71. Oksanen J, Blanchet FG, Kindt R, Legendre P, Minchin P, O’Hara RB, *et al.* vegan:  
617 Community Ecology Package. CRAN R package. 2017.
- 618  
619 72. Zhang Z. Variable selection with stepwise and best subset approaches. *Ann Transl Med*  
620 2016, **4**(7): 136.
- 621  
622 73. Sakamoto Y, Ishiguro M, Kitagawa G. *Akaike Information Criterion Statistics*. D. Reidel  
623 Publishing Company: Boston, 1986.
- 624

- 625 74. Hu A, Wang J, Sun H, Niu B, Si G, Wang J, *et al.* Mountain biodiversity and ecosystem  
626 functions: interplay between geology and contemporary environments. *ISME J* 2020,  
627 **14(4)**: 931-944.
- 628  
629 75. Ishwaran H, Kogalur UB. Random survival forests for R. *R News* 2007, **7**: 25-31.
- 630  
631 76. Ishwaran H, Kogalur UB. Fast Unified Random Forests for Survival, Regression, and  
632 Classification (RF-SRC). 2019.
- 633  
634 77. Grace JB, Anderson TM, Seabloom EW, Borer ET, Adler PB, Harpole WS, *et al.*  
635 Integrative modelling reveals mechanisms linking productivity and plant species richness.  
636 *Nature* 2016, **529**: 390.
- 637  
638 78. Grace JB, Anderson TM, Olf H, Scheiner SM. On the specification of structural equation  
639 models for ecological systems. *Ecol Monogr* 2010, **80(1)**: 67-87.
- 640  
641 79. Rosseel Y. lavaan: An R Package for Structural Equation Modeling. *J Stat Softw* 2012,  
642 **48(2)**: 1-36.
- 643  
644

645 **Material and methods**

646 **Experimental design**

647 The comparative field microcosm experiments were conducted on Laojun  
648 Mountain in China (26.6959 N; 99.7759 E) in September-October 2013, and on  
649 Balggesvarri Mountain in Norway (69.3809 N; 20.3483 E) in July 2013, designed to be  
650 broadly representative of subtropical and subarctic climatic zones, respectively, as first  
651 reported in Wang *et al.* (2016)<sup>32</sup>. The annual temperatures ranged from 4.2-12.9 °C in  
652 China and -2.9-0.7 °C in Norway. The experiments were characterised by an aquatic  
653 ecosystem with consistent initial DOM composition but different locally colonised  
654 microbial communities and newly produced endogenous DOM. While allowing us to  
655 minimise the complexity of natural ecosystems, the experiment provided a means for  
656 investigating DOM-microbe associations at large spatial scales by controlling the initial  
657 DOM supply. Briefly, we selected locations with five different elevations on each  
658 mountainside. The elevations were 3,822, 3,505, 2,915, 2,580 and 2,286 m a.s.l. on  
659 Laojun Mountain in China, and 750, 550, 350, 170 and 20 m a.s.l. on Balggesvarri  
660 Mountain in Norway. At each elevation, we established 30 aquatic microcosms (1.5 L  
661 bottle) composed of 15 g of sterilised lake sediment and 1.2 L of sterilised artificial lake  
662 water, which included one of ten nutrient levels of 0, 0.45, 1.80, 4.05, 7.65, 11.25, 15.75,  
663 21.60, 28.80 and 36.00 mg N L<sup>-1</sup> of KNO<sub>3</sub>. Each nutrient level was replicated three times.  
664 The lake sediments were obtained from the centre of Taihu Lake, China, and were  
665 aseptically canned per bottle after autoclaving as previously described in Wang *et al.*  
666 (2016)<sup>32</sup>. To compensate for nitrate additions shifting stoichiometric ratios, KH<sub>2</sub>PO<sub>4</sub> was  
667 added to bottles so that the N/P ratio of the initial overlying water was 14.93, which was  
668 similar to the annual average ratio in Taihu Lake during 2007 (14.49). Nutrient levels for  
669 the experiments were selected based on conditions of the eutrophic Taihu Lake, and the  
670 highest nitrate concentration was based on the maximum total nitrogen in 2007 (20.79 mg  
671 L<sup>-1</sup>; Fig. S27). We chose the nutrient level of this year because a massive cyanobacteria  
672 bloom in Taihu Lake happened in May 2007 and initiated an odorous drinking water  
673 crisis in the nearby city of Wuxi. The microcosms were left in the field for one month  
674 allowing airborne bacteria to freely colonise the sediments and water, and the sediment  
675 bacteria were examined using high-throughput sequencing of 16S rRNA genes. The

676 sequences were processed in QIIME (v1.9)<sup>49</sup> and OTUs were defined at 97% sequence  
677 similarity. The bacterial sequences were rarefied to 20,000 per sample. Further details on  
678 field experiments, sample collection, physicochemical and bacterial community analyses  
679 are available in Wang *et al.* (2016).

680

## 681 **ESI FT-ICR MS analysis of DOM samples**

682 Highly accurate mass measurements of DOM within the sediment samples were  
683 conducted using a 15 Tesla solarix XR system, a ultrahigh-resolution Fourier transform  
684 ion cyclotron resonance mass spectrometer (FT-ICR MS, Bruker Daltonics, Billerica,  
685 MA) coupled with an electrospray ionization (ESI) interface, as demonstrated previously  
686<sup>50</sup> with some modifications. DOM was solid-phase extracted (SPE) with Agilent VacElut  
687 resins before FT-ICR MS measurement<sup>51</sup> with minor modifications. Briefly, an aliquot  
688 of 0.7 g freeze-dried sediment was sonicated with 30 ml ultrapure water for 2 h, and  
689 centrifuged at 5,000 g for 20 min. The extracted water was filtered through the 0.45 µm  
690 Millipore filter and further acidified to pH 2 using 1 M HCl. Cartridges were drained,  
691 rinsed with ultrapure water and methanol (ULC-MS grade), and conditioned with pH 2  
692 ultrapure water. Calculated volumes of extracts were slowly passed through cartridges  
693 based on DOC concentration. Cartridges were rinsed with pH 2 ultrapure water and dried  
694 with N<sub>2</sub> gas. Samples were finally eluted with methanol into precombusted amber glass  
695 vials, dried with N<sub>2</sub> gas and stored at -20 °C until DOM analysis. The extracts were  
696 continuously injected into the standard ESI source with a flow rate of 2 µl min<sup>-1</sup> and an  
697 ESI capillary voltage of 3.5 kV in negative ion mode. One hundred single scans with a  
698 transient size of 4 mega words, an ion accumulation time of 0.3 s, and within the mass  
699 range of m/z 150-1200, were co-added to a spectrum with absorption mode for phase  
700 correction, thereby resulting in a resolving power of 750,000 (FWHM at m/z 400). All  
701 FT-ICR mass spectra were internally calibrated using organic matter homologous series  
702 separated by 14 Da (-CH<sub>2</sub> groups). The mass measurement accuracy was typically within  
703 1 ppm for singly charged ions across a broad m/z range (150-1,200 m/z).

704 Data Analysis software (BrukerDaltonik version 4.2) was used to convert raw  
705 spectra to a list of m/z values using FT-MS peak picker with a signal-to-noise ratio (S/N)



706 threshold set to 7 and absolute intensity threshold to the default value of 100. Putative  
707 chemical formulae were assigned using the software Formularity<sup>52</sup> following the  
708 Compound Identification Algorithm<sup>53</sup>. In total, 19,538 molecular formulas were  
709 putatively assigned for all samples (n = 300) based on the following criteria: S/N > 7, and  
710 mass measurement error < 1 ppm, considering the presences of C, H, O, N, S and P and  
711 excluding other elements or an isotopic signature. All formula assignments were further  
712 screened to meet the criteria as follows<sup>54</sup>: (1) formulae containing an odd number of  
713 nitrogen atoms had an even nominal m/z and those containing an even number of  
714 nitrogen atoms had an odd nominal m/z; (2) the number of hydrogen atoms was at least  
715 1/3 of carbon and could not exceed 2C+N+2; (3) the number of nitrogen or oxygen atoms  
716 could not exceed the number of carbon atoms; (4) the ratio of O/C was set to 0-1, H/C ≥  
717 0.3, N/C ≤ 1, double bond equivalents (DBE) ≥ 0.

718 The assigned molecules were categorised into eight compound classes or 12  
719 elemental combinations. The compound classes based on van Krevelen diagrams<sup>55</sup> were  
720 lipids (O/C = 0-0.3, H/C = 1.5-2.0), proteins and amino sugars (O/C = 0.3-0.67, H/C =  
721 1.5-2.2), carbohydrates (Carb; O/C = 0.67-1.2, H/C = 1.5-2), unsaturated hydrocarbons  
722 (UnsatHC; O/C = 0-0.1, H/C = 0.7-1.5), lignin (O/C = 0.1-0.67, H/C = 0.7-1.5), tannin  
723 (O/C = 0.67-1.2, H/C = 0.5-1.5), and condensed aromatics (ConHC; O/C = 0-0.67, H/C =  
724 0.2-0.7). The elemental combinations were CH, CHN, CHNO, CHNOP, CHNOS,  
725 CHNOSP, CHNS, CHO, CHOP, CHOS, CHOSP and CHS.

726

## 727 **Estimating DOM features**

728 We considered DOM features from three aspects: alpha diversity, beta diversity  
729 and molecular traits. These features were considered for all molecules (19,538 different  
730 formulae), but also for subsets of molecules within each category of compound classes or  
731 elemental combinations. The dataset based on all molecular formulae was named “All  
732 molecules”, while the datasets of subsets of formulae were named by “category name +  
733 compounds”. The relative abundance of molecules was calculated by normalizing signal  
734 intensities of assigned peaks to the sum of all intensities within each sample. We  
735 considered two additional aspects of chemodiversity: chemical alpha diversity and

736 chemical beta diversity. Chemical alpha diversity was calculated using a richness index  
737 that counts the total number of peaks in each sample. Chemical beta diversity was  
738 calculated with the Bray-Curtis dissimilarity metric, and further represented by the first  
739 two axes of a non-metric multidimensional scaling (NMDS) ordination of this  
740 dissimilarity. We also considered overall molecular composition, which was visualised  
741 across the elevations and nutrient enrichment treatments with detrended correspondence  
742 analysis (DCA) <sup>56</sup>. The analyses of chemical diversity were performed using the R  
743 package *vegan* V2.4.6 <sup>57</sup>.

744 We also calculated 16 molecular traits that could affect microbial associations and  
745 were related to molecular weight, stoichiometry, chemical structure, and oxidation state  
746 (Table S1). These traits were mass, the number of carbon (C) atoms, the modified  
747 aromaticity index ( $AI_{Mod}$ ) <sup>58</sup>, DBE <sup>58</sup>, DBE minus oxygen ( $DBE_O$ ) <sup>58</sup>, DBE minus AI  
748 ( $DBE_{AI}$ ) <sup>58</sup>, standard Gibb's Free Energy of carbon oxidation (GFE) <sup>59</sup>, Kendrick Defect  
749 ( $kdefect_{CH_2}$ ) <sup>60</sup>, nominal oxidation state of carbon (NOSC), O/C ratio, H/C ratio, N/C  
750 ratio, P/C ratio, S/C ratio, and carbon use efficiency ( $Y_{met}$ ) <sup>61</sup>. All calculations were  
751 performed using the R package *ftmsRanalysis* V1.0.0 <sup>62</sup> and the scripts at  
752 <https://github.com/danczakre/ICRTutorial>. DBE represents the number of unsaturated  
753 bonds and rings in a molecule <sup>58</sup>. Higher values of DBE, AI and NOSC all indicate a  
754 higher recalcitrance of DOM. A large Kendrick Defect can indicate a higher degree of  
755 oxidation. Lower values of  $Y_{met}$  indicate a higher thermodynamic efficiency of metabolic  
756 reactions involved in biomass production <sup>61</sup>. Weighted means of formula-based molecular  
757 traits (for example the  $Mass_{wm}$  for Mass) were calculated as the sum of the product of the  
758 trait value for each individual molecule ( $Mass_i$ ) and relative intensity  $I_i$  divided by the  
759 sum of all intensities ( $Mass_{wm} = \sum(Mass_i \times I_i) / \sum(I_i)$ ) using the R package *FD* V1.0.12 <sup>63</sup>.  
760 In addition, ten molecular sub-mixtures were grouped based on the 16 molecular traits by  
761 hierarchical cluster analysis using Ward's minimum variance method with the R package  
762 *stats* V3.6.1.

763

764 **Estimating bacterial communities**

765 The relative abundance of OTUs was calculated by the normalization of read  
766 counts of OTUs to the sum of all reads within each sample. Likewise, we considered two  
767 aspects of biodiversity: bacterial alpha diversity and beta diversity. Bacterial alpha  
768 diversity was calculated using species richness that counts the total number of OTUs in  
769 each sample. Bacterial beta diversity was calculated with the Bray-Curtis dissimilarity  
770 metric, and further represented by the first two axes of NMDS of this dissimilarity.

771

## 772 **Estimating associations between DOM and microbes**

773 At the DOM composition level, we examined DOM-microbe associations from  
774 the following aspects: Pearson's correlation between alpha diversity of DOM and bacteria,  
775 and a Mantel correlation between the beta diversity of DOM and bacteria. We also tested  
776 the congruence between DOM and bacterial composition using Procrustes analysis of  
777 NMDS coordinates estimated for each community across elevations and nutrient  
778 enrichment levels with the Bray-Curtis dissimilarity metric<sup>35,36</sup>. Procrustes analysis is a  
779 technique for comparing the relative positions of points in two multivariate datasets. It  
780 attempts to stretch and rotate the points in one matrix, such as points obtained from a  
781 NMDS, to be as close as possible to points in another matrix, thus preserving the relative  
782 distances between points within each matrix<sup>35,36</sup>. This procedure yields a measure of fit,  
783  $M^2$ , which is the sum of squared distances between corresponding data points after the  
784 transformation. Pointwise residuals indicate the difference between two different  
785 community ordinations for each sample. The statistical significance of the Procrustes  
786 analysis (i.e.,  $M^2$ ) can then be assessed by randomly permutating the data 1,000 times<sup>64</sup>.  
787 This analysis was performed using the R package `vegan` V2.4.6.

788 We further quantified DOM-microbe associations at a molecular level using two  
789 different co-occurrence analyses. First, Spearman's rank correlation coefficient  $\rho$  was  
790 calculated between the relative abundance of each molecule  $m/z$  ion and bacterial OTU  
791 (or genus). For each molecule, we then calculated the Spearman  $\rho$  difference by  
792 subtracting the mean absolute  $\rho$  value of the negative correlations across all bacterial  
793 OTUs from the mean of the positive correlations. Larger positive and negative values  
794 indicate that molecules were more strongly positively and negatively correlated with

795 bacterial communities, respectively. The relationships among the Spearman  $\rho$  difference,  
796 H/C and O/C were summarised using kriging interpolation with the R package automap  
797 V1.0.14<sup>65</sup>. Second, SparCC (Sparse Correlations for Compositional data) was applied to  
798 build DOM-microbe bipartite networks. SparCC is a correlation method that can infer the  
799 interrelationships between DOM and bacteria for compositional data with higher  
800 accuracy<sup>37</sup> than general correlation approaches, such as Spearman's correlation, because  
801 it explicitly assumes that the underlying networks have many missing associations. We  
802 used bacterial genera rather than OTUs for bipartite network analysis because there were  
803 over 20,000 and 10,000 bacterial OTUs for Norway and China, respectively, and there  
804 are computational limits on handling such large bipartite networks for the analyses  
805 described in the next paragraph. However, using bacterial genera was reasonable as  
806 individual DOM-bacteria associations were similar for both bacterial OTUs and genera  
807 ( $R^2 > 0.80$ ,  $P \leq 0.001$ ; Fig. S14). Similar conclusions were also obtained with either  
808 OTUs or genera when relating the pairwise distances of molecular traits with SparCC  $\rho$   
809 values among DOM molecules in Fig. 3c. To reduce type I errors in the correlation  
810 calculations created by low-occurrence genera or molecules, the majority rule was  
811 applied, retaining genera or molecules observed in more than half of the total samples ( $\geq$   
812 75 samples) in China or Norway. The filtered table, including 1,340 and 1,246 DOM  
813 molecules, and 75 and 49 bacterial genera in China and Norway, respectively, was then  
814 used for pairwise correlation calculation of DOM and bacteria using SparCC with default  
815 parameters<sup>37</sup>.

816 Finally, bipartite network analysis at a molecule and network level was performed  
817 to quantify the specialization of DOM-microbe associations. The threshold correlation for  
818 inclusion in bipartite networks was  $|\rho| = 0.30$  to exclude weak interactions and we  
819 retained the adjacent matrix with only the interactions between DOM and bacteria. We  
820 then constructed two types of networks based on negative and positive correlations  
821 (SparCC  $\rho \leq -0.30$  and  $\rho \geq 0.30$ , respectively). The SparCC  $\rho$  values were multiplied by  
822 10,000 and rounded to integers, and the absolute values were taken for negative networks  
823 to enable the calculations of specialization indices. A separate negative and positive  
824 network was obtained for each microcosm based on its species composition. For the

825 network level analysis, we calculated  $H_2'$ , a measure of specialization<sup>30</sup>, for each  
826 network:

$$827 \quad H_2 = -\sum_{i=1}^i \sum_{j=1}^j (p_{ij} \ln p_{ij}),$$

$$828 \quad H_2' = \frac{H_{2\max} - H_2}{H_{2\max} - H_{2\min}},$$

829 where  $p_{ij} = a_{ij}/m$ , represents the proportion of interactions in a  $i \times j$  matrix.  $a_{ij}$  is  
830 number of interactions between DOM molecule  $i$  and bacterial genus  $j$ , which is also  
831 referred as “link weight”.  $m$  is total number of interactions between all DOM molecules  
832 and bacterial genera.  $H_2'$  is the standardised  $H_2$  against the minimum ( $H_{2\min}$ ) and  
833 maximum ( $H_{2\max}$ ) possible for the same distribution of interaction totals.

834 For the molecular level analysis, we calculated the specialization index Kullback-  
835 Leibler distance ( $d'$ ) for DOM molecules ( $d'_i$ ) and bacterial genera ( $d'_j$ ), which describes  
836 the levels of “vulnerability” of DOM molecules and “generality” of bacterial genera,  
837 respectively:

$$838 \quad d_i = \sum_{j=1}^j \left( \frac{a_{ij}}{A_i} \ln \frac{a_{ij}m}{A_i A_j} \right),$$

$$839 \quad d'_i = \frac{d_i - d_{\min}}{d_{\max} - d_{\min}},$$

840 where  $A_i = \sum_{j=1}^j a_{ij}$  and  $A_j = \sum_{i=1}^i a_{ij}$ , are the total number of interactions of DOM  
841 molecule  $i$  and bacterial genus  $j$ , respectively.  $d'_i$  is the standardised  $d_i$  against the  
842 minimum ( $d_{\min}$ ) and maximum ( $d_{\max}$ ) possible for the same distribution of interaction  
843 totals. The equations of  $d'_j$  are analogous to  $d'_i$ , replacing  $j$  by  $i$ .

844 Both specialization indices consider interaction abundance and are standardised to  
845 account for heterogeneity in the interaction strength and species richness. Weighted  
846 means of  $d'$  for DOM were calculated for each network as the sum of the product of  $d'$   
847 for each individual molecule  $i$  ( $d'_i$ ) and relative intensity  $I_i$  divided by the sum of all  
848 intensities  $d' = \sum(d'_i \times I_i) / \sum(I_i)$ . Weighted means of  $d'$  for bacteria were calculated as the  
849 sum of the  $d'$  of each individual bacterial genus  $j$  ( $d'_j$ ) and relative abundance of bacterial  
850 genus  $I_j$  divided by the sum of all abundance. All calculations were performed using the

851 R package FD V1.0.12. The observed  $H_2'$  and  $d'$  values ranged from 0 (complete  
852 generalization) to 1 (complete specialization)<sup>31</sup> (Fig. S28). To directly compare the  
853 network indices across the elevations or nutrient enrichment levels, we used a null  
854 modelling approach. We standardised the three observed specialization indices ( $S_{\text{observed}}$ ;  
855 that is,  $H_2'$ ,  $d'$  of DOM, and  $d'$  of bacteria) by calculating their z-scores<sup>66</sup> using the  
856 equation  $z_S = (S_{\text{observed}} - \bar{S}_{\text{null}}) / (\sigma_{S_{\text{null}}})$  where  $\bar{S}_{\text{null}}$  and  $\sigma_{S_{\text{null}}}$  were, respectively, the mean  
857 and standard deviation of the null distribution of  $S$  ( $S_{\text{null}}$ ). One hundred randomised null  
858 networks were generated for each bipartite network to derive  $S_{\text{null}}$  using the *swap.web*  
859 algorithm, which keeps species richness and the number of interactions per species  
860 constant along with network connectance. The relationships among  $H_2'$ , weighted means  
861 of  $d'$  for DOM molecules and bacterial genera were compared using kriging interpolation  
862 with the R package automap V1.0.14. The obtained network was visualised using circlize  
863 V0.4.10<sup>67</sup> and analysed using the R package bipartite V2.15<sup>30</sup>.

864

## 865 **Statistical analyses**

866 We used the following explanatory variables related to distal and proximal  
867 controls on DOM-microbe associations. Distal environmental drivers included climate  
868 change (i.e., water temperature), human impacts (i.e., nutrient enrichment), and  
869 contemporary nutrients (i.e., sediment total nitrogen (TN), total phosphorus (TP),  $\text{NO}_x^-$ ,  
870  $\text{NO}_2^-$ ,  $\text{NH}_4^+$  and  $\text{PO}_4^{3-}$ , and water  $\text{NO}_3^-$ ,  $\text{NO}_2^-$ ,  $\text{NH}_4^+$  and  $\text{PO}_4^{3-}$ ). Proximal drivers included  
871 energy supply (i.e., sediment total organic carbon, dissolved organic carbon, water pH  
872 and sediment Chlorophyll *a* (Chl *a*)), biodiversity (i.e., the species richness and the first  
873 two axes of the NMDS of bacterial community composition), DOM chemodiversity (i.e.,  
874 the species richness and the first two axes of the NMDS of molecular composition), and  
875 DOM molecular traits (i.e., mass, C,  $\text{Al}_{\text{Mod}}$ , DBE,  $\text{DBE}_{\text{O}}$ ,  $\text{DBE}_{\text{Al}}$ , GFE,  $\text{kdefect}_{\text{CH}_2}$ ,  
876 NOSC, O/C, H/C, N/C, P/C, S/C and  $Y_{\text{met}}$ ). Detailed information about these explanatory  
877 variables is listed in Table S1. It should be noted that water pH could be considered to be  
878 relevant to primary productivity due to its strong positive correlation with sediment Chl *a*,  
879 but their relationships varied across elevations and nutrient levels<sup>32</sup>. The response  
880 variables included DOM features (i.e., alpha diversity, beta diversity and molecular traits)

881 and DOM-microbe network statistics (e.g.,  $H_2'$ ), and were analysed for their patterns and  
882 underlying drivers along the two main environmental gradients: elevation and nutrient  
883 enrichment.

#### 884 **(1) Patterns of DOM features and DOM-microbe associations along the** 885 **environmental gradients**

886 For DOM features, the relationships between nutrient enrichment and DOM  
887 richness or molecular traits were visualised with linear models for all formulae and  
888 subsets of formulae within each category of compound classes or elemental combinations  
889 across different elevations. We further tested the breakpoints or abrupt changes in DOM  
890 composition (i.e., the first axis of DCA) along the gradient of nutrient enrichment using a  
891 piecewise linear regression with the R package segmented V1.3.0<sup>33</sup>. These breakpoint  
892 estimations were supported by gradient forest analysis<sup>34</sup>, which was used to assess the  
893 DOM compositional changes and important breakpoints across multiple molecules along  
894 the gradient of nutrient enrichment. This analysis produces the standardised density of  
895 splits, that is the kernel density of splits divided by the observation density, which shows  
896 where important changes in the abundance of multiple molecules occur along the nutrient  
897 gradient and indicates the compositional rate of change. In addition, we estimated the  
898 standardised density of splits for subsets of molecules within each category of compound  
899 classes or elemental combinations across different elevations. This analysis was  
900 performed using the R packages gradientForest V0.1.17<sup>34</sup> and extendedForest V1.6.1<sup>68</sup>.

901 For DOM-microbe associations, the relationships between nutrient enrichment  
902 and associations at both community and network levels were tested with linear models for  
903 all formulae and subsets of formulae within each category of compound classes or  
904 elemental combinations across different elevations.

#### 905 **(2) Drivers of DOM features and DOM-microbe associations**

906 To evaluate the key drivers of DOM features and DOM-microbe associations, we  
907 used variation partitioning analysis (VPA)<sup>69</sup>, multiple regression, random forest analysis  
908<sup>42</sup> and structural equation modelling (SEM)<sup>41</sup>. In particular, the first analysis  
909 disentangled the important roles of microbes from other explanatory variables, while the



910 latter three analyses tested the roles of molecular traits and diversity, and their interplay  
911 with environments and energy supply.

912 First, VPA was used to quantify the relative contributions of driver categories  
913 towards DOM features. We partitioned explanatory variables into the following driver  
914 categories: environments (that is, climate change, human impacts and contemporary  
915 nutrients), energy supply and biodiversity (Table S1). We selected explanatory variables  
916 for regression analyses by forward selection with Akaike information criterion (AIC) <sup>70</sup>.  
917 We also quantified the relative contributions of driver categories for subsets of molecules  
918 within each category of compound classes or elemental combinations. VPA was  
919 performed with R package *vegan* V2.4.6 <sup>71</sup>.

920 Second, stepwise multiple regression was performed to test the statistical  
921 significance and predictive power of the net effects of diversity (i.e., biodiversity and  
922 chemodiversity) or molecular traits on the bipartite network specialization  $H_2'$ . The net  
923 effects of diversity or molecular traits were evaluated by the improvements in the  
924 explained variances relative to models without diversity and molecular traits (i.e., in  
925 models using only the variables associated with environments and energy supply). The  
926 analysis was conducted with forward selection of explanatory variables <sup>72</sup>. We chose the  
927 final model that had the lowest AIC value <sup>73</sup>. ANOVA was used to test the statistical  
928 significance of two models including or excluding diversity or molecular traits as  
929 predictors, and the increase in the model  $R^2$  was determined as the net effects of diversity  
930 or molecular traits on  $H_2'$ .

931 Third, random forest analysis was conducted to identify the relative importance of  
932 environment variables, energy supply, bacterial diversity and DOM molecular drivers on  
933 specialization  $H_2'$ . The importance of each predictor variable was determined by  
934 evaluating the decrease in prediction accuracy (that is, increase in the mean square error  
935 between observations and out-of-bag predictions) when the data for that predictor were  
936 randomly permuted. The accuracy importance measure was computed for each tree and  
937 averaged over the forest (2,000 trees). More details on this method were described in  
938 previous literature <sup>74</sup>. In addition, random forest analysis was also used to test the net

939 effects of diversity or molecular traits on  $H_2'$ . This analysis was conducted using the R  
940 package randomForestSRC V2.8.0<sup>75,76</sup>.

941 Finally, SEM was used to explore how specialization  $H_2'$  is interactively  
942 influenced by global changes (that is, temperature and nutrient enrichment), diversity and  
943 molecular traits. The approach begins by hypothesising the underlying structure of causal  
944 links as shown in Fig. S1. Then, the model is translated into regression equations, and  
945 these equations are evaluated against the data to test the hypothesised links. Through this  
946 process, SEM provides an understanding of direct and indirect links of climate change  
947 and human impacts on  $H_2'$ . Before modelling, all variables in the SEMs were Z-score  
948 transformed to allow comparisons among multiple predictors and models. Similar to  
949 previous studies<sup>77</sup>, we used composite variables to account for the collective effects of  
950 climate change, human impacts, contemporary nutrients, energy supply, biodiversity,  
951 chemodiversity and molecular traits, and the candidate observed indicators are given in  
952 Table S1. The indicators for each composite were selected based on the multiple  
953 regressions for  $H_2'$  (Table S2). Based on all the hypothesised links among composite  
954 variables (that is, full model; Fig. S1), we examined all alternative models using AIC and  
955 overall model fit statistics<sup>78</sup>. We chose the final model to report as that with the lowest  
956 AIC value from models with a non-significant  $\chi^2$  test ( $P > 0.05$ ), which tests whether the  
957 model structure differs from the observed data, high comparative fit index (CFI  $> 0.95$ )  
958 and low standardised root mean squared residual (SRMR  $< 0.05$ ) (Table S3). We  
959 implemented the SEMs using R package lavaan V.0.5.23<sup>79</sup>.

960

## 961 **Predictions of DOM-microbe associations in Taihu Lake**

962 Using the parameter estimates obtained from SEM fitted to the bipartite networks  
963 in subtropical China, we estimated spatiotemporal variation of DOM-microbe  
964 associations in Taihu Lake based on the direct and indirect effects of climate change and  
965 eutrophication via the proximal drivers. We first formulated five linear equations to  
966 predict the values of contemporary nutrients ( $P_{\text{nut}}$ ), energy supply ( $P_{\text{energy}}$ ), biodiversity  
967 ( $P_{\text{biodiv}}$ ), chemodiversity ( $P_{\text{chemodiv}}$ ) and molecular traits ( $P_{\text{trait}}$ ) based on climate and  
968 eutrophication drivers:

969  $P_{\text{nut}} = \lambda_{\text{nut,temp}} \times X_T + \lambda_{\text{nut,N}} \times X_N$

970  $P_{\text{energy}} = \lambda_{\text{energy,temp}} \times X_T + \lambda_{\text{energy,N}} \times X_N + \lambda_{\text{energy,nut}} \times P_{\text{nut}}$

971  $P_{\text{biodiv}} = \lambda_{\text{biodiv,temp}} \times X_T + \lambda_{\text{biodiv,N}} \times X_N + \lambda_{\text{biodiv,nut}} \times P_{\text{nut}} + \lambda_{\text{biodiv,energy}} \times P_{\text{energy}}$

972  $P_{\text{chemodiv}} = \lambda_{\text{chemodiv,temp}} \times X_T + \lambda_{\text{chemodiv,N}} \times X_N + \lambda_{\text{chemodiv,nut}} \times P_{\text{nut}} + \lambda_{\text{chemodiv,energy}} \times$   
973  $P_{\text{energy}}$

974  $P_{\text{trait}} = \lambda_{\text{trait,temp}} \times X_T + \lambda_{\text{trait,N}} \times X_N + \lambda_{\text{trait,nut}} \times P_{\text{nut}} + \lambda_{\text{trait,energy}} \times P_{\text{energy}} + \lambda_{\text{trait,biodiv}} \times$   
975  $P_{\text{biodiv}} + \lambda_{\text{trait,chemodiv}} \times P_{\text{chemodiv}}$

976 where  $X_T$  and  $X_N$  were water temperature and total nitrogen, respectively, for the  
977 32 sites across the whole Taihu Lake (Fig. S27a). The abbreviations of path coefficients  
978 ( $\lambda$ ) are detailed in Table S4.

979 Similarly, we calculated the specialization of DOM-microbe associations ( $Y_{H2}$ )  
980 using a linear equation:  $Y_{H2} = \lambda_{H2,temp} \times X_T + \lambda_{H2,N} \times X_N + \lambda_{H2,nut} \times P_{\text{nut}} + \lambda_{H2,energy} \times P_{\text{energy}}$   
981  $+ \lambda_{H2,biodiv} \times P_{\text{biodiv}} + \lambda_{H2,chemodiv} \times P_{\text{chemodiv}} + \lambda_{H2,trait} \times P_{\text{trait}}$ . We used the predicted values  
982 for contemporary nutrients, energy supply, biodiversity, chemodiversity and molecular  
983 traits in the overall prediction model to account for the indirect effects of water  
984 temperature and total nitrogen on specialization. The models were calculated with a  
985 yearly time step based on the annual means of water temperature and total nitrogen for  
986 each site during 2007-2018. The temporal changes in specialization were calculated using  
987 2007 as a baseline to which all predictions were compared.

988 The above predictions aimed to apply our EDTiA framework to estimate changes  
989 in DOM-microbe associations under temperature change and eutrophication in Taihu  
990 Lake, and potential uncertainties in the estimated associations should however be noted  
991 as follows. First, local environmental variation (e.g., N/P ratio changes) and different  
992 microbial species pools between our field microcosms and natural lake sediments would  
993 likely influence the accuracy of predictions. Second, spatial and temporal heterogeneity  
994 of sediments would influence local environments and the composition of both DOM and  
995 microbes and thus the projection of estimates across Taihu Lake. Third, the transferability  
996 and extrapolation of SEM models to Taihu Lake would be one of the difficulties in

997 prediction practices. We thus selected the SEM models in China rather than Norway for  
998 more similar climatic conditions to the target lake. The annual mean water temperatures  
999 in Taihu Lake were covered by the temperature variations across the elevations between  
1000 2,286 and 3,822 m a.s.l. in Laojun Mountain, and the annual mean total nitrogen fell into  
1001 the gradient of nutrient concentrations between 0 and 36 mg N L<sup>-1</sup>. Finally, lake  
1002 management such as mechanical removal of algae would affect energy supply and  
1003 consequently prediction accuracy.

1004

1005

1006 **Figure legends**

1007 **Figure 1. A framework for studying the effects of global change on DOM-**  
1008 **microbe associations.** (a) DOM-microbe associations affected by the three proximal  
1009 controls, namely energy supply and both the diversity and traits of DOM and microbes.  
1010 The relationships among the three controls and their influences on the associations are  
1011 shown with single-sided arrows. The DOM-microbe associations, indicated by double-  
1012 sided arrows, are measured by bipartite interactions between DOM molecules (circles  $C_1-$   
1013  $C_i$ ) and microbial species (circles  $M_1-M_j$ ). The size of circles indicates the abundance of  
1014 DOM molecules or microbial species, and the width of arrows is the magnitude of  
1015 associations. Commonly used indices summarise the specialization of individual  
1016 molecule  $i$  and microbial species  $j$ , such as  $d'$  for DOM and microbes, which describes  
1017 the levels of “vulnerability” of DOM molecules and “generality” of microbial species,  
1018 respectively. (b) Conceptual framework for understanding DOM-microbe associations  
1019 under distal drivers such as global change via the three proximal drivers. For better 3D  
1020 visualization, the sizes of triangles decrease towards the top-right, and the color changes  
1021 towards different corners of the triangles represent variations in the relative importance of  
1022 different proximal drivers under a global change scenario. The background depicts the  
1023 primary motivation of this study in examining distal drivers of climate change and  
1024 eutrophication in Taihu Lake, China. The left and right waters indicate clean and  
1025 cyanobacteria-dominated lake states, respectively, and are separated by a road having the  
1026 shapes of western lakeshore and northern Zhushan and Meiliang Bays of Taihu Lake. We  
1027 setup field microcosms on mountainsides by adding sediments collected from the lake  
1028 centre, and designed nutrient levels and N/P ratio based on nutrient conditions of this lake  
1029 <sup>32</sup>.

1030

1031 **Figure 2. DOM features and their microbial associations at a compositional**  
1032 **level.** (a) The effects of nutrient enrichment on DOM alpha diversity (richness),  
1033 composition and molecular traits (e.g., H/C ratio) for all formulae across different  
1034 elevations in China (red lines) and Norway (blue lines). Molecular richness and weighted  
1035 mean (WM) of H/C ratio were plotted against the nutrient gradient of nitrate, and their

1036 relationships are indicated by solid ( $P \leq 0.05$ ) or dotted ( $P > 0.05$ ) lines estimated using  
1037 linear models. For better visualization, we did not include the data points in Fig. 2a but  
1038 showed detailed scatter plots in Fig. S5. To visualise the compositional turnover of DOM,  
1039 we plotted the standardised density of splits showing where important changes in the  
1040 abundance of multiple molecules occurred along the nutrient gradient. The standardised  
1041 density of splits was determined by gradient forest analysis<sup>34</sup>. (b) The congruence  
1042 between DOM and bacterial compositions across different elevations in China and  
1043 Norway was examined using Procrustes analysis<sup>35,36</sup>. Each line with circle and triangle  
1044 ends connects to a single community of DOM and bacteria, respectively, and is colored  
1045 by elevation in either China (red) or Norway (blue). The fit of overall Procrustes  
1046 transformation is reported as the  $M^2$  value. (c) The effects of nutrient enrichment on  
1047 DOM-microbe associations. The associations were quantified by the Pearson correlation  
1048 coefficient  $r$  between alpha diversity of DOM and bacteria (upper panel), and by the  
1049 Mantel  $r$  between the beta diversity of DOM and bacteria (lower panel). We then  
1050 visualised these associations with loess regression models along the nutrient gradient.  
1051 The colours of the lines indicate the DOM composition for all formulae and categories of  
1052 compound classes or elemental combinations.

1053

1054 **Figure 3. Networks between DOM and bacteria.** (a) Strength of the correlations  
1055 between DOM molecules and bacterial OTUs in China (upper panel) and Norway (lower  
1056 panel). For each molecule, we subtracted the mean absolute Spearman's rank correlation  
1057 coefficient  $\rho$  of all the negative correlations with individual bacterial OTUs from the  
1058 mean of the positive correlations to derive  $\Delta\rho$ .  $\Delta\rho$  was further visualised against the  
1059 molecular traits H/C and O/C. (b) The negative and positive bipartite networks between  
1060 DOM molecules and bacterial genera in China or Norway estimated using SparCC  
1061 (Sparse Correlations for Compositional data)<sup>37</sup>. Upper nodes represent bacterial genera  
1062 coloured by their phylum, while lower nodes represent DOM molecules coloured by the  
1063 ten clusters obtained with hierarchical cluster analysis based on 16 molecular traits  
1064 described in Fig. S17 and Table S1. A line connecting two nodes indicates an interaction  
1065 between a DOM molecule and bacterial genus. (c-d) We examined the relationships

1066 between molecular traits and the negative (left panel) or positive (right panel) DOM-  
1067 microbe bipartite networks in China (upper panel) or Norway (lower panel). For all pairs  
1068 of DOM molecules, we separately calculated pairwise Gower distances between the  
1069 molecular traits and their SparCC  $\rho$  values with bacterial OTUs. Statistical significance  
1070 between distance matrices was determined with a Mantel test with 999 permutations and  
1071 indicated by solid ( $P \leq 0.05$ ) or dotted ( $P > 0.05$ ) lines. We considered all formulae (c)  
1072 and also subsets of formulae within the category of compound classes or elemental  
1073 combinations (d). For all formulae (c), we calculated SparCC correlation coefficients  
1074 based on both bacterial OTUs (grey lines) and genera (black lines).

1075

1076 **Figure 4. Relative importance of diversity and molecular traits in explaining**  
1077 **specialization of DOM-microbe networks.** (a) We plotted specialization  $H_2'$  against  
1078 nutrient enrichment for negative (left panel) and positive (right panel) bipartite networks  
1079 for each elevation in China (red lines) and Norway (blue lines). Statistical significance of  
1080 linear model fits was indicated by solid ( $P \leq 0.05$ ) or dotted ( $P > 0.05$ ) lines. For better  
1081 visualization, we omitted the data points but these are shown in Fig. S20. (b) We  
1082 examined the relative importance of all explanatory variables on the  $H_2'$  of negative (left  
1083 panel) and positive (right panel) bipartite networks in China (red lines) and Norway (blue  
1084 lines) using random forest. The relative contribution (%) of each variable towards  $H_2'$  is  
1085 shown in radar plots. The explanatory variables were grouped by environment, energy,  
1086 diversity and traits with consistent colors of ovals or rectangles as in Fig. S1.  
1087 Abbreviations of explanatory variables are detailed in Table S1.

1088

1089 **Figure 5. Structural equation models <sup>41</sup> to explain specialization of DOM-**  
1090 **microbe networks.** Stacked bar plots show the standardised effects (Std. effects) of  
1091 predictor variables on the  $H_2'$  of negative (left panel) and positive (right panel) bipartite  
1092 networks in China or Norway estimated from the best supported models. We considered  
1093 (a) the total and indirect effects of global change and human impacts via proximal  
1094 variables and (b) the total and direct effects of proximal variables. Proximal variables



1095 were energy supply, biodiversity, chemodiversity and molecular traits, and are described  
1096 in detail in Table S2. Details of the full structural equation models are shown in Fig. S24.

1097

1098 **Figure 6. Decadal change in predicted specialization of DOM-microbe**  
1099 **networks in Taihu Lake.** (a) Changes in  $H_2'$  of negative (upper panel) and positive  
1100 (lower panel) bipartite networks from 2007 to 2018. (b) The spatial distribution of  
1101 changes in  $H_2'$  of negative (upper panel) and positive (lower panel) networks in 2018  
1102 across the Taihu Lake. Estimated changes in  $H_2'$  were calculated for the 32 sites across  
1103 the whole of Taihu Lake (Fig. S27a) by comparing with the baseline of 2007, and  
1104 represent the combined effects of climate change and eutrophication. The colored dots in  
1105 (a) indicate  $H_2'$  changes for individual sites which are consistent with the figure legend of  
1106 (b), and black dots are the mean values for each year. The box in (a) represents the  
1107 interquartile (50% of data), the horizontal line in the box represents the median, the  
1108 “notch” represents the 95% confidence interval of the median and the “whiskers”  
1109 represent the maximum and minimum values.

1110

1111

Figure 1

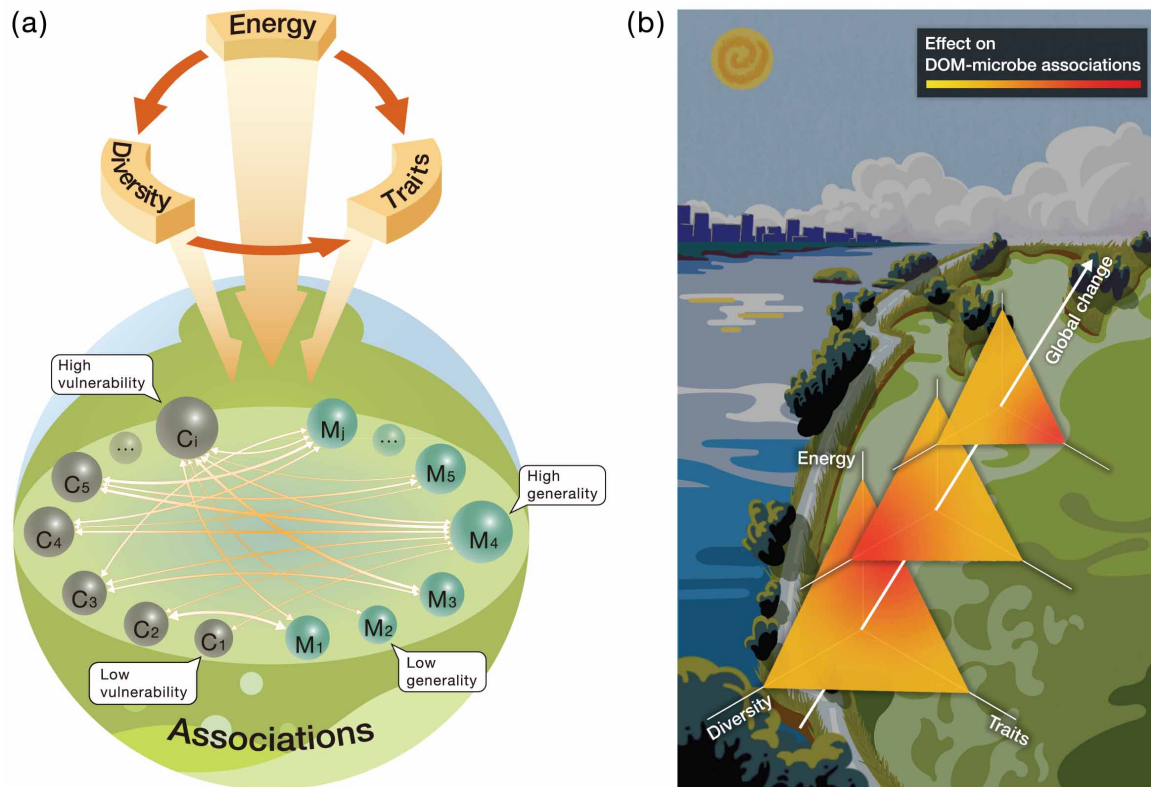

1112

1113

**Figure 2**

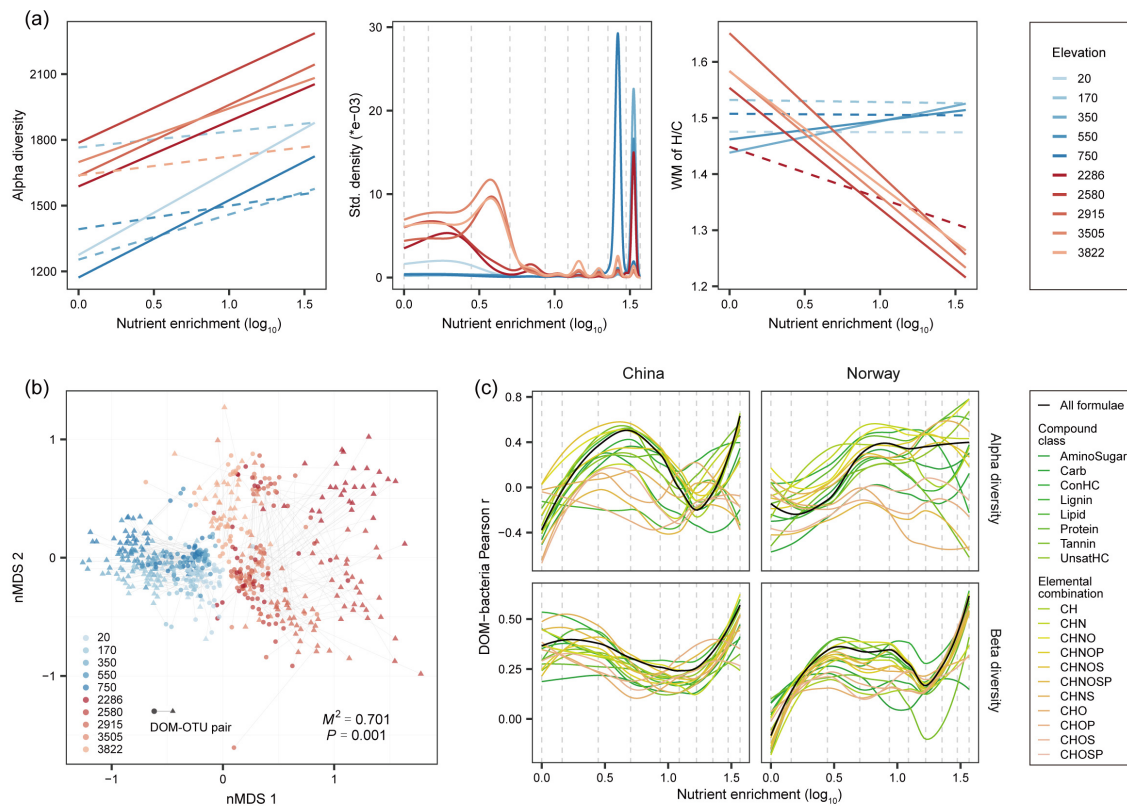

1114

1115

**Figure 3**

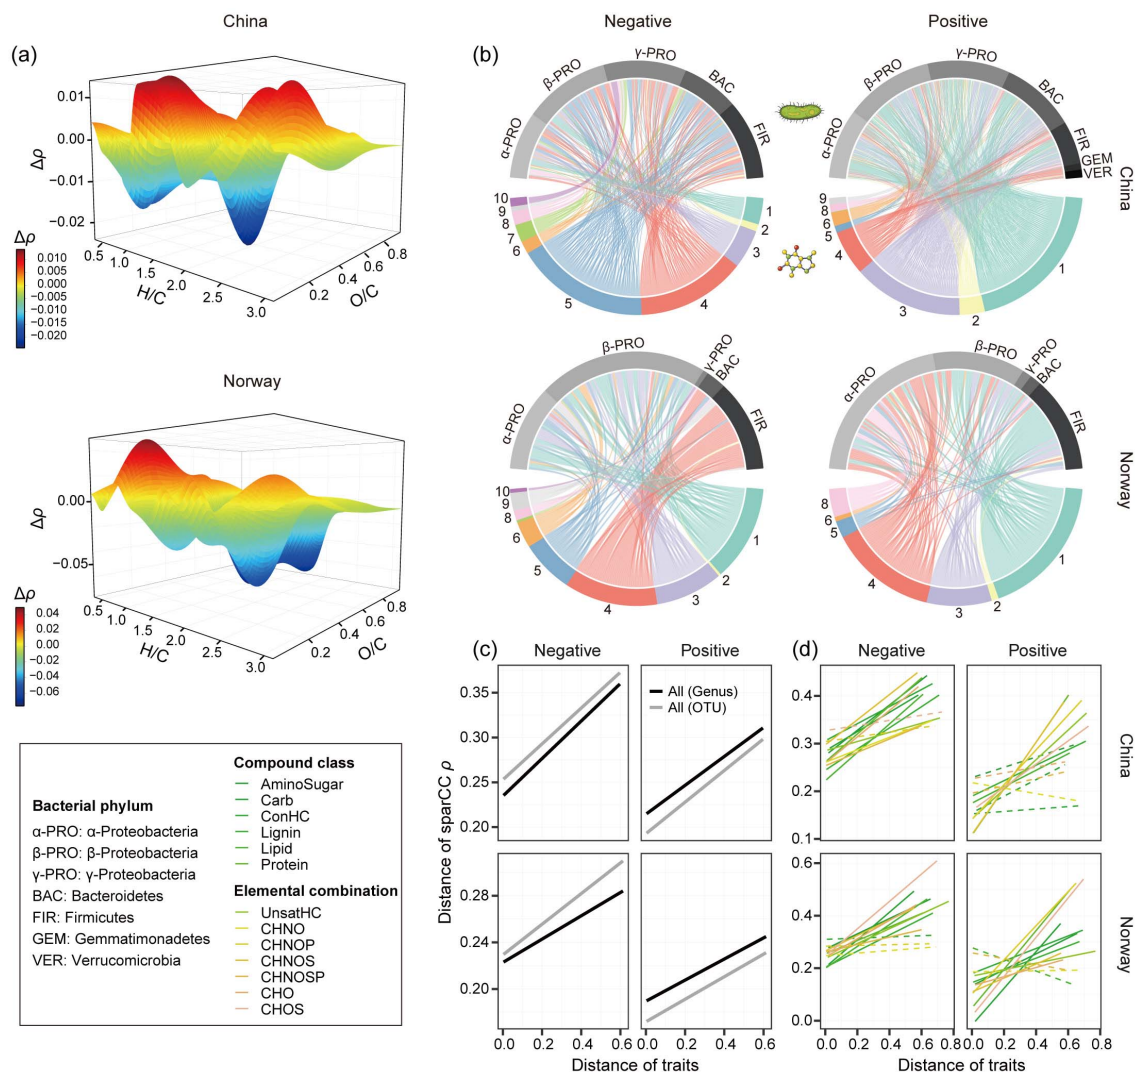

1116

1117

**Figure 4**

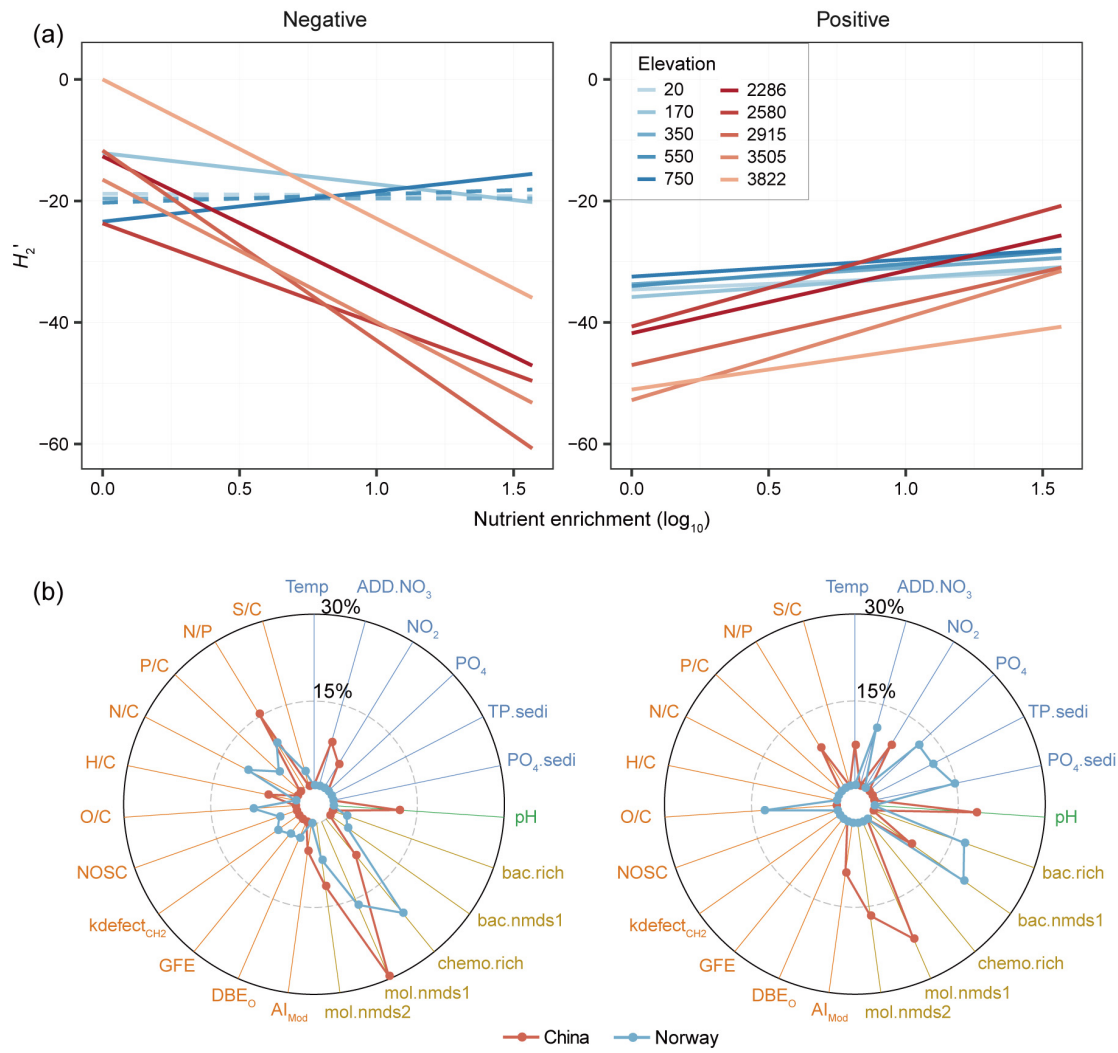

1118

1119

**Figure 5**

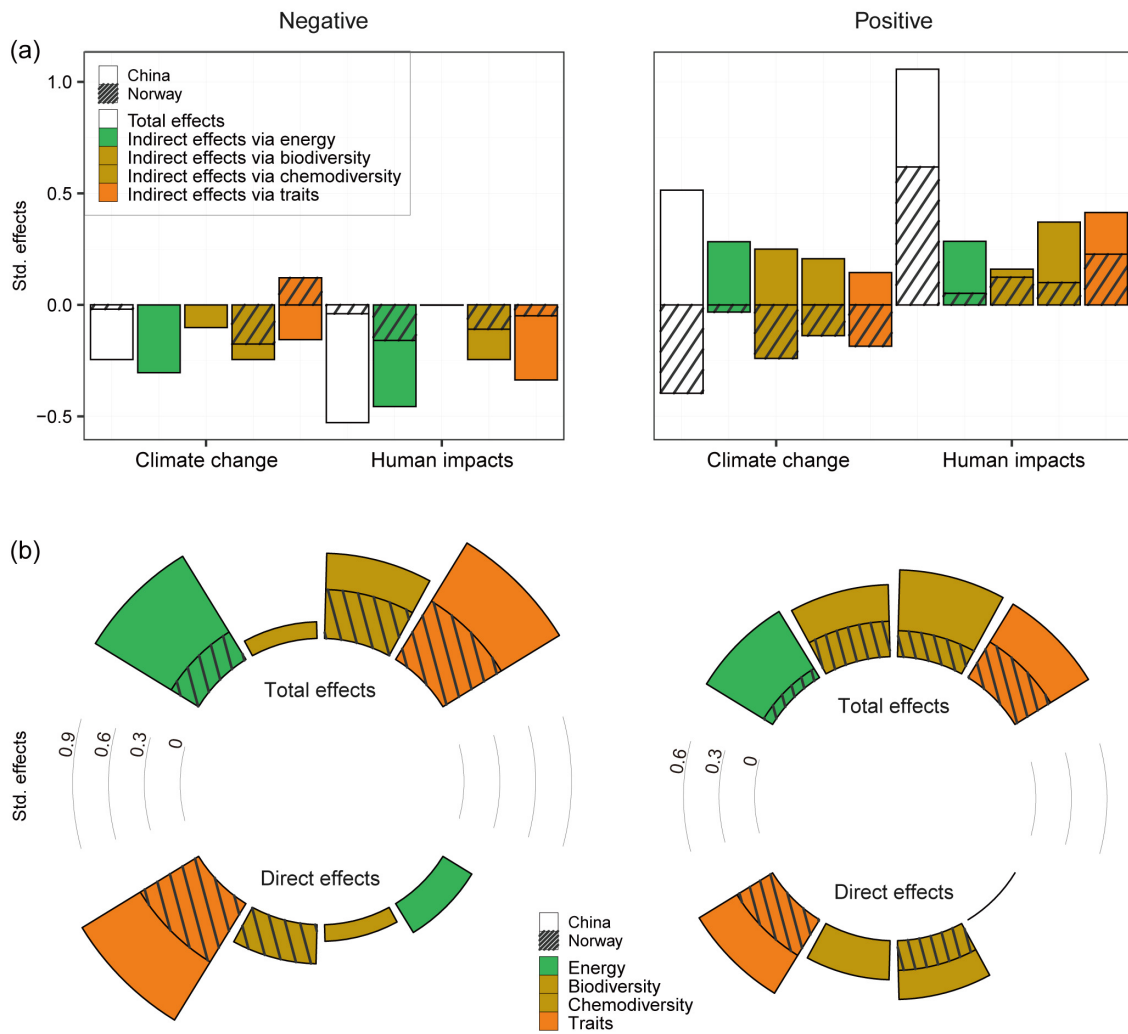

1120

1121

Figure 6

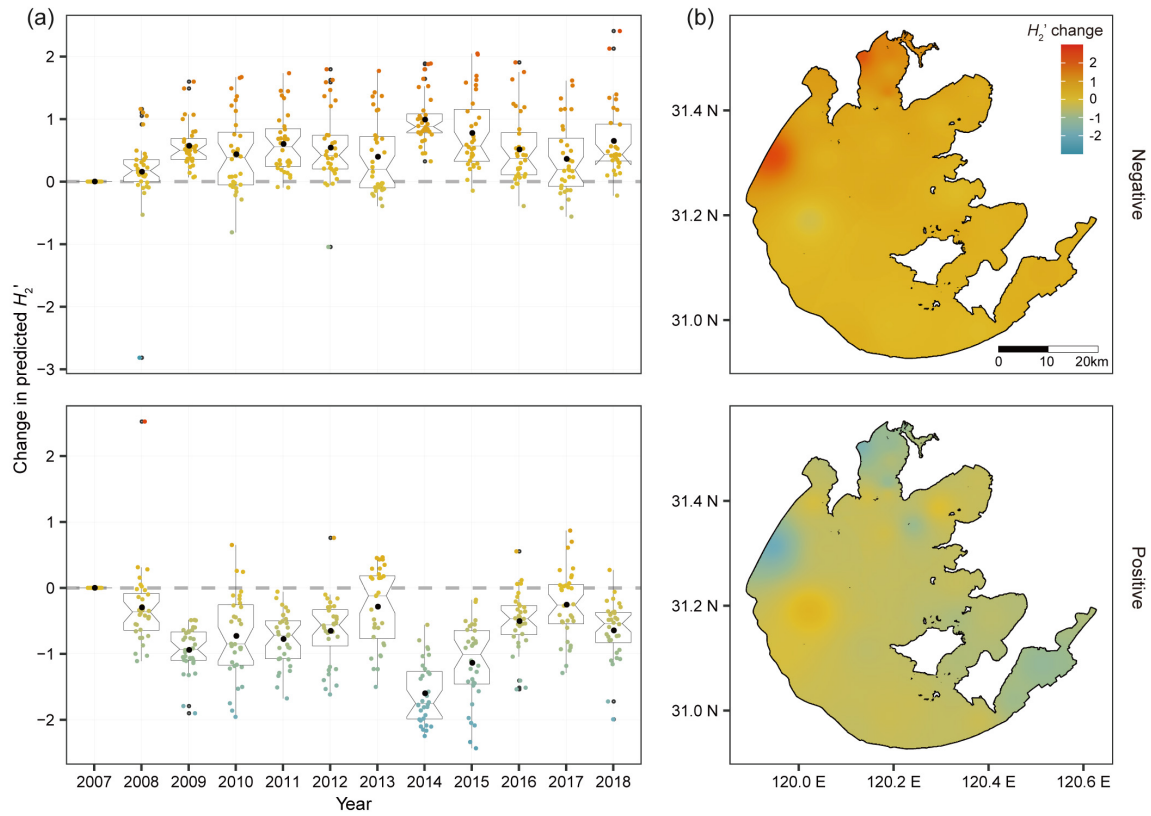

1122
